# Supplementary material for: Causal association between tea consumption and head and neck cancer: a Mendelian randomization study
Source: Royal Society of Chemistry journal article supplement (doi:10.1039/d3fo04017h), 2024-01-01
Supplement: d3fo04017h1.pdf [file d3fo04017h1.pdf]

Since the raw data is too large, we provide the raw data download link here:

[https://gwas.mrcieu.ac.uk/datasets/finn-b-C3\\_LARYNX/](https://gwas.mrcieu.ac.uk/datasets/finn-b-C3_LARYNX/)

[https://gwas.mrcieu.ac.uk/datasets/finn-b-C3\\_LARYNX\\_EXALLC/](https://gwas.mrcieu.ac.uk/datasets/finn-b-C3_LARYNX_EXALLC/)

[https://gwas.mrcieu.ac.uk/datasets/finn-b-C3\\_LIP\\_ORAL\\_PHARYNX\\_EXALLC/](https://gwas.mrcieu.ac.uk/datasets/finn-b-C3_LIP_ORAL_PHARYNX_EXALLC/)

[https://gwas.mrcieu.ac.uk/datasets/finn-b-C3\\_LIP\\_ORAL\\_PHARYNX/](https://gwas.mrcieu.ac.uk/datasets/finn-b-C3_LIP_ORAL_PHARYNX/)

<https://gwas.mrcieu.ac.uk/datasets/ieu-b-89/>

<https://gwas.mrcieu.ac.uk/datasets/ieu-b-90/>

<https://gwas.mrcieu.ac.uk/datasets/ieu-b-94/>

<https://gwas.mrcieu.ac.uk/datasets/ieu-b-96/>

<https://gwas.mrcieu.ac.uk/datasets/ieu-b-93/>

<https://gwas.mrcieu.ac.uk/datasets/ieu-b-97/>

<https://gwas.mrcieu.ac.uk/datasets/ukb-b-6066/>

<https://gwas.mrcieu.ac.uk/datasets/ukb-b-4078/>

<https://gwas.mrcieu.ac.uk/datasets/ukb-b-13344/>

<https://gwas.mrcieu.ac.uk/datasets/ukb-b-3291/>

<https://gwas.mrcieu.ac.uk/datasets/ukb-b-5209/>

<https://gwas.mrcieu.ac.uk/datasets/ukb-b-8553/>

<https://gwas.mrcieu.ac.uk/datasets/ukb-b-11491/>

<https://gwas.mrcieu.ac.uk/datasets/ukb-b-17988/>
