# Supplementary material for: Causal association between tea consumption and head and neck cancer: a Mendelian randomization study
Source: Royal Society of Chemistry journal article supplement (doi:10.1039/d3fo04017h), 2024-01-01
Supplement: d3fo04017h2.xlsx [file d3fo04017h2.xlsx]

## Sheet: Sheet1
Pval thershold of IV extraction	GWAS id of exposure	GWAS id of outcome	Outcome	Exposure	NSNP	Inverse variance weighted			MR Egger			Simple mode			Weighted median			Weighted mode			Wald ratio			Main MR results in MR-PRESSO(raw or outliers corrected analysis)			Raw or outliers corrected analysis?	MR-PRESSO Global test	Samplesize of outcome	Alpha	Proportion of cases in the study	OR	R2	Power	NCP	Samplesize of exposure	F
						B	SE	Pval	B	SE	Pval	B	SE	Pval	B	SE	Pval	B	SE	Pval	B	SE	Pval	B	SE	Pval		pval
5e-08	ukb-b-6066	ieu-b-89	Oral cavity and pharyngeal cancer || id:ieu-b-89	Tea intake || id:ukb-b-6066	35	0.292801	0.428859	0.494767	0.530888	1.00052	0.599242	-1.12798	1.36068	0.412895	0.562523	0.668394	0.400009	0.640553	0.763644	0.407435	NA	NA	NA	0.229835	0.418377	0.586254	raw	0.546	5425	0.05	0.460276	1.34018	0.00515749	0.122821	0.614503	447485	66.2765
5e-08	ukb-b-6066	ieu-b-94	Oral cavity cancer || id:ieu-b-94	Tea intake || id:ukb-b-6066	35	0.0873973	0.524966	0.867778	-0.221617	1.22396	0.857424	-0.215597	1.39067	0.877713	0.0975433	0.786052	0.901242	0.234083	0.853864	0.785632	NA	NA	NA	0.0105453	0.496607	0.983179	raw	0.647	4151	0.05	0.294628	1.09133	0.00515749	0.0540478	0.0352503	447485	66.2765
5e-08	ukb-b-6066	ieu-b-96	Oropharyngeal cancer || id:ieu-b-96	Tea intake || id:ukb-b-6066	35	0.44036	0.593615	0.458192	1.31451	1.38668	0.350045	0.18188	1.99996	0.928072	-0.00313577	0.934559	0.997323	0.719736	1.20302	0.553623	NA	NA	NA	0.455976	0.579847	0.436941	raw	0.364	4018	0.05	0.271279	1.55327	0.00515749	0.169273	0.9935	447485	66.2765
5e-08	ukb-b-6066	ieu-b-90	Oral cavity and pharyngeal cancer || id:ieu-b-90	Tea intake || id:ukb-b-6066	35	0.698601	0.446724	0.117857	0.62866	1.0369	0.548472	0.408878	1.37044	0.767247	0.956226	0.67517	0.156695	0.444931	0.815897	0.589088	NA	NA	NA	0.588871	0.417946	0.167669	raw	0.666	4671	0.05	0.501392	2.01094	0.00515746	0.416043	3.05435	447485	66.2762
5e-08	ukb-b-6066	ieu-b-93	Oral cavity cancer || id:ieu-b-93	Tea intake || id:ukb-b-6066	35	0.923195	0.559318	0.0988257	1.49441	1.31112	0.262577	1.55075	1.52139	0.315261	1.64993	0.804156	0.0401939	1.3397	0.93794	0.162315	NA	NA	NA	0.849251	0.55364	0.134035	raw	0.395	3464	0.05	0.327656	2.51732	0.00515746	0.627713	5.2246	447485	66.2762
5e-08	ukb-b-6066	ieu-b-97	Oropharyngeal cancer || id:ieu-b-97	Tea intake || id:ukb-b-6066	35	0.475601	0.562167	0.397546	-0.155576	1.29844	0.905354	-0.865264	1.53298	0.576165	-0.00581601	0.911206	0.994907	-0.621839	0.948421	0.516457	NA	NA	NA	0.337704	0.526793	0.525661	raw	0.675	3448	0.05	0.324536	1.60898	0.00515746	0.178526	1.06848	447485	66.2762
5e-08	ukb-b-6066	finn-b-C3_LIP_ORAL_PHARYNX	Malignant neoplasm of lip, oral cavity and pharynx || id:finn-b-C3_LIP_ORAL_PHARYNX	Tea intake || id:ukb-b-6066	39	0.733589	1.21981	0.547576	0.768712	2.66754	0.774823	0.447683	3.39402	0.895757	0.0765522	1.82342	0.966512	0.328217	1.88089	0.862398	NA	NA	NA	0.842825	1.12285	0.457389	raw	0.749	218792	0.05	0.000575889	2.08254	0.00548838	0.146635	0.809477	447485	63.3154
5e-08	ukb-b-6066	finn-b-C3_LIP_ORAL_PHARYNX_EXALLC	"Malignant neoplasm of lip, oral cavity and pharynx" (all cancers excluded) || id:finn-b-C3_LIP_ORAL_PHARYNX_EXALLC	Tea intake || id:ukb-b-6066	39	0.728911	1.22108	0.550549	0.744922	2.67023	0.781819	0.641911	3.2649	0.845181	-0.0911304	1.69952	0.957237	0.409463	1.97017	0.83647	NA	NA	NA	0.835942	1.11339	0.457273	raw	0.746	174132	0.05	0.000723589	2.07282	0.00548838	0.144831	0.794771	447485	63.3154
5e-08	ukb-b-6066	finn-b-C3_LARYNX	Malignant neoplasm of larynx || id:finn-b-C3_LARYNX	Tea intake || id:ukb-b-6066	39	-1.67269	1.08194	0.122102	-3.76006	2.36637	0.12058	-1.62054	2.59455	0.53597	-2.9513	1.49594	0.0485093	-2.59449	1.74574	0.14548	NA	NA	NA	-1.83262	1.08498	0.0991837	raw	0.264	218792	0.05	0.000822699	0.187741	0.00548838	0.127441	0.652476	447485	63.3154
5e-08	ukb-b-6066	finn-b-C3_LARYNX_EXALLC	Malignant neoplasm of larynx (all cancers excluded) || id:finn-b-C3_LARYNX_EXALLC	Tea intake || id:ukb-b-6066	39	-1.6604	1.09681	0.130066	-3.81549	2.39738	0.12	-1.7543	2.67369	0.51569	-2.99554	1.53994	0.0517461	-2.59011	1.64981	0.124717	NA	NA	NA	-1.82361	1.10007	0.105398	raw	0.26	174185	0.05	0.00103338	0.190062	0.00548838	0.127008	0.648922	447485	63.3154
5e-08	ukb-b-4078	ieu-b-89	Oral cavity and pharyngeal cancer || id:ieu-b-89	Green tea intake || id:ukb-b-4078	7	-0.0199997	0.0288086	0.48754	-0.0555137	0.0596949	0.395076	0.0289073	0.0477775	0.567316	0.0185027	0.0353288	0.600468	0.0272619	0.0435804	0.55464	NA	NA	NA	-0.0199997	0.0288086	0.513508	raw	0.328	5425	0.05	0.460276	0.980199	0.00345511	0.050213	0.00185961	64949	32.1652
5e-08	ukb-b-4078	ieu-b-94	Oral cavity cancer || id:ieu-b-94	Green tea intake || id:ukb-b-4078	7	-0.0656325	0.0328628	0.0458074	-0.0710711	0.0648873	0.323318	-0.0784266	0.0620344	0.253033	-0.0613296	0.0412025	0.136621	-0.0702158	0.0576837	0.269206	NA	NA	NA	-0.0656325	0.0195192	0.0151833	raw	0.928	4151	0.05	0.294628	0.936475	0.00345511	0.0514334	0.0125022	64949	32.1652
5e-08	ukb-b-4078	ieu-b-96	Oropharyngeal cancer || id:ieu-b-96	Green tea intake || id:ukb-b-4078	7	0.0160285	0.0410367	0.6961	-0.0531673	0.0813974	0.542478	0.0536334	0.0684459	0.463082	0.0407478	0.0447719	0.362759	0.0598961	0.0604948	0.360356	NA	NA	NA	0.0160285	0.0410367	0.709591	raw	0.238	4018	0.05	0.271279	1.01616	0.00345511	0.0500814	0.000710282	64949	32.1652
5e-08	ukb-b-4078	ieu-b-90	Oral cavity and pharyngeal cancer || id:ieu-b-90	Green tea intake || id:ukb-b-4078	7	0.00480706	0.0277738	0.86259	-0.0464899	0.0550223	0.436703	0.0323871	0.0531568	0.564685	0.0178524	0.0352356	0.612394	0.0368963	0.0527532	0.510485	NA	NA	NA	0.00480706	0.0179119	0.797402	raw	0.864	4671	0.05	0.501392	1.00482	0.00345511	0.0500107	9.32314e-05	64949	32.1652
5e-08	ukb-b-4078	ieu-b-93	Oral cavity cancer || id:ieu-b-93	Green tea intake || id:ukb-b-4078	7	-0.0267615	0.0348298	0.442279	-0.0938892	0.0697436	0.236046	0.0153992	0.0649099	0.820364	-0.00616927	0.0443908	0.889469	0.0242531	0.0685725	0.735671	NA	NA	NA	-0.0267615	0.0262122	0.346663	raw	0.75	3464	0.05	0.327656	0.973593	0.00345511	0.0502144	0.00187107	64949	32.1652
5e-08	ukb-b-4078	ieu-b-97	Oropharyngeal cancer || id:ieu-b-97	Green tea intake || id:ukb-b-4078	7	0.0320597	0.0346089	0.354269	0.0177548	0.0685839	0.80605	0.0288787	0.0622382	0.659003	0.0287057	0.0437849	0.512076	0.0323559	0.056501	0.587676	NA	NA	NA	0.0320597	0.017708	0.120198	raw	0.966	3448	0.05	0.324536	1.03258	0.00345511	0.050311	0.00271479	64949	32.1652
5e-08	ukb-b-4078	finn-b-C3_LIP_ORAL_PHARYNX	Malignant neoplasm of lip, oral cavity and pharynx || id:finn-b-C3_LIP_ORAL_PHARYNX	Green tea intake || id:ukb-b-4078	20	-0.0492629	0.0368534	0.181312	-0.126316	0.0708388	0.0914333	-0.0299126	0.0762067	0.699043	-0.0433482	0.0524016	0.408106	-0.0552658	0.0593555	0.363484	NA	NA	NA	-0.0492629	0.0303293	0.120792	raw	0.853	218792	0.05	0.000575889	0.951931	0.0102016	0.0503401	0.00296857	64949	33.4599
5e-08	ukb-b-4078	finn-b-C3_LIP_ORAL_PHARYNX_EXALLC	"Malignant neoplasm of lip, oral cavity and pharynx" (all cancers excluded) || id:finn-b-C3_LIP_ORAL_PHARYNX_EXALLC	Green tea intake || id:ukb-b-4078	20	-0.0495005	0.0369232	0.180039	-0.127062	0.0709932	0.0903266	-0.029964	0.0815587	0.717387	-0.041407	0.0526	0.431161	-0.0579515	0.0605492	0.350539	NA	NA	NA	-0.0495005	0.0300793	0.116274	raw	0.86	174132	0.05	0.000723589	0.951705	0.0102016	0.0503433	0.00299618	64949	33.4599
5e-08	ukb-b-4078	finn-b-C3_LARYNX	Malignant neoplasm of larynx || id:finn-b-C3_LARYNX	Green tea intake || id:ukb-b-4078	20	0.0208115	0.0310713	0.502988	0.0730607	0.0597966	0.237536	-0.00686664	0.0705013	0.923431	0.0267783	0.0436262	0.539339	0.00613515	0.0486767	0.901025	NA	NA	NA	0.0208115	0.0293543	0.486949	raw	0.612	218792	0.05	0.000822699	1.02103	0.0102016	0.0500929	0.000811388	64949	33.4599
5e-08	ukb-b-4078	finn-b-C3_LARYNX_EXALLC	Malignant neoplasm of larynx (all cancers excluded) || id:finn-b-C3_LARYNX_EXALLC	Green tea intake || id:ukb-b-4078	20	0.0202699	0.0311368	0.515049	0.0714851	0.0598988	0.248193	-0.00969307	0.0663283	0.885352	0.0264702	0.0434656	0.54253	0.00422171	0.0525064	0.936757	NA	NA	NA	0.0202699	0.0293638	0.49835	raw	0.605	174185	0.05	0.00103338	1.02048	0.0102016	0.0500881	0.000769125	64949	33.4599
5e-08	ukb-b-13344	ieu-b-89	Oral cavity and pharyngeal cancer || id:ieu-b-89	Herbal tea intake || id:ukb-b-13344	6	0.0371884	0.0230076	0.106018	0.0630583	0.136692	0.668541	0.0666512	0.0414454	0.168711	0.0425041	0.0282836	0.132896	0.0657456	0.0385057	0.148449	NA	NA	NA	0.0371884	0.015621	0.0631132	raw	0.809	5425	0.05	0.460276	1.03789	0.00312625	0.0506698	0.00584468	64949	33.9436
5e-08	ukb-b-13344	ieu-b-94	Oral cavity cancer || id:ieu-b-94	Herbal tea intake || id:ukb-b-13344	6	0.0441205	0.027876	0.113481	0.141829	0.166333	0.441884	0.0727474	0.0521505	0.22183	0.0576152	0.0352596	0.102253	0.0698986	0.0451418	0.182201	NA	NA	NA	0.0441205	0.0184506	0.0622895	raw	0.852	4151	0.05	0.294628	1.04511	0.00312625	0.0506127	0.00534677	64949	33.9436
5e-08	ukb-b-13344	ieu-b-96	Oropharyngeal cancer || id:ieu-b-96	Herbal tea intake || id:ukb-b-13344	6	0.0389548	0.0306746	0.204108	0.113727	0.180982	0.563845	0.055039	0.0568203	0.377208	0.0486004	0.037537	0.195413	0.0632471	0.0541765	0.295677	NA	NA	NA	0.0389548	0.0196946	0.104853	raw	0.841	4018	0.05	0.271279	1.03972	0.00312625	0.0504396	0.00383644	64949	33.9436
5e-08	ukb-b-13344	ieu-b-90	Oral cavity and pharyngeal cancer || id:ieu-b-90	Herbal tea intake || id:ukb-b-13344	6	0.0334698	0.0253501	0.186734	0.0177173	0.15511	0.914564	0.0501556	0.046174	0.326948	0.0419972	0.0315413	0.183025	0.047125	0.0486425	0.377138	NA	NA	NA	0.0334698	0.0191948	0.14167	raw	0.745	4671	0.05	0.501392	1.03404	0.00312625	0.0504686	0.00408956	64949	33.9436
5e-08	ukb-b-13344	ieu-b-93	Oral cavity cancer || id:ieu-b-93	Herbal tea intake || id:ukb-b-13344	6	0.0428554	0.030421	0.158911	-0.100605	0.190715	0.625741	-0.0150058	0.0649506	0.826445	0.0372282	0.0370096	0.31446	-0.0104574	0.0616204	0.871893	NA	NA	NA	0.0428554	0.0298723	0.210861	raw	0.499	3464	0.05	0.327656	1.04379	0.00312625	0.0505096	0.00444738	64949	33.9436
5e-08	ukb-b-13344	ieu-b-97	Oropharyngeal cancer || id:ieu-b-97	Herbal tea intake || id:ukb-b-13344	6	0.0146437	0.0411514	0.721953	0.137974	0.277809	0.645492	-0.0505548	0.0742086	0.525978	-0.018825	0.0444349	0.671819	-0.0406815	0.0733906	0.603242	NA	NA	NA	0.0146437	0.0411514	0.736474	raw	0.189	3448	0.05	0.324536	1.01475	0.00312625	0.0500583	0.000509329	64949	33.9436
5e-08	ukb-b-13344	finn-b-C3_LIP_ORAL_PHARYNX	Malignant neoplasm of lip, oral cavity and pharynx || id:finn-b-C3_LIP_ORAL_PHARYNX	Herbal tea intake || id:ukb-b-13344	19	0.00823547	0.0289848	0.77631	0.153617	0.155445	0.336892	0.0074429	0.072086	0.918906	0.00642715	0.043142	0.881572	0.0052726	0.0542612	0.923665	NA	NA	NA	0.00823547	0.0289714	0.779453	raw	0.448	218792	0.05	0.000575889	1.00827	0.00981738	0.0500097	8.4541e-05	64949	33.8817
5e-08	ukb-b-13344	finn-b-C3_LIP_ORAL_PHARYNX_EXALLC	"Malignant neoplasm of lip, oral cavity and pharynx" (all cancers excluded) || id:finn-b-C3_LIP_ORAL_PHARYNX_EXALLC	Herbal tea intake || id:ukb-b-13344	19	0.00741467	0.0289843	0.798092	0.154586	0.155414	0.333844	0.00242325	0.0692323	0.972464	0.0298177	0.0428212	0.486222	0.000268819	0.0510362	0.995855	NA	NA	NA	0.00741467	0.0289843	0.800993	raw	0.407	174132	0.05	0.000723589	1.00744	0.00981738	0.0500078	6.84625e-05	64949	33.8817
5e-08	ukb-b-13344	finn-b-C3_LARYNX	Malignant neoplasm of larynx || id:finn-b-C3_LARYNX	Herbal tea intake || id:ukb-b-13344	19	-0.0141178	0.0266296	0.596004	0.00611767	0.146323	0.967138	-0.0414444	0.0505368	0.422896	-0.0279803	0.0348319	0.421804	-0.0137143	0.0421857	0.748859	NA	NA	NA	-0.0141178	0.0266296	0.602483	raw	0.277	218792	0.05	0.000822699	0.985981	0.00981738	0.0500398	0.000347002	64949	33.8817
5e-08	ukb-b-13344	finn-b-C3_LARYNX_EXALLC	Malignant neoplasm of larynx (all cancers excluded) || id:finn-b-C3_LARYNX_EXALLC	Herbal tea intake || id:ukb-b-13344	19	-0.0142257	0.0262979	0.588546	0.0105715	0.144293	0.942451	-0.0389411	0.0558688	0.494701	-0.0223744	0.0359988	0.534249	-0.0120989	0.0401951	0.766861	NA	NA	NA	-0.0142257	0.0262979	0.595178	raw	0.318	174185	0.05	0.00103338	0.985875	0.00981738	0.0500403	0.000352217	64949	33.8817
5e-08	ukb-b-3291	ieu-b-89	Oral cavity and pharyngeal cancer || id:ieu-b-89	Standard tea intake || id:ukb-b-3291	2	0.00491432	0.00436454	0.26018	NA	NA	NA	NA	NA	NA	NA	NA	NA	NA	NA	NA	NA	NA	NA	NA	NA	NA	NA	NA	5425	0.05	0.460276	1.00493	0.00203005	0.0500076	6.60988e-05	64949	66.0558
5e-08	ukb-b-3291	ieu-b-94	Oral cavity cancer || id:ieu-b-94	Standard tea intake || id:ukb-b-3291	2	0.00271279	0.00534622	0.611858	NA	NA	NA	NA	NA	NA	NA	NA	NA	NA	NA	NA	NA	NA	NA	NA	NA	NA	NA	NA	4151	0.05	0.294628	1.00272	0.00203005	0.0500015	1.29023e-05	64949	66.0558
5e-08	ukb-b-3291	ieu-b-96	Oropharyngeal cancer || id:ieu-b-96	Standard tea intake || id:ukb-b-3291	2	0.00659655	0.00941861	0.483694	NA	NA	NA	NA	NA	NA	NA	NA	NA	NA	NA	NA	NA	NA	NA	NA	NA	NA	NA	NA	4018	0.05	0.271279	1.00662	0.00203005	0.0500081	7.03783e-05	64949	66.0558
5e-08	ukb-b-3291	ieu-b-90	Oral cavity and pharyngeal cancer || id:ieu-b-90	Standard tea intake || id:ukb-b-3291	2	0.00238616	0.00493328	0.628608	NA	NA	NA	NA	NA	NA	NA	NA	NA	NA	NA	NA	NA	NA	NA	NA	NA	NA	NA	NA	4671	0.05	0.501392	1.00239	0.00203005	0.0500015	1.34974e-05	64949	66.0558
5e-08	ukb-b-3291	ieu-b-93	Oral cavity cancer || id:ieu-b-93	Standard tea intake || id:ukb-b-3291	2	0.00616771	0.00676097	0.361636	NA	NA	NA	NA	NA	NA	NA	NA	NA	NA	NA	NA	NA	NA	NA	NA	NA	NA	NA	NA	3464	0.05	0.327656	1.00619	0.00203005	0.0500068	5.90562e-05	64949	66.0558
5e-08	ukb-b-3291	ieu-b-97	Oropharyngeal cancer || id:ieu-b-97	Standard tea intake || id:ukb-b-3291	2	-0.00113049	0.00564172	0.841183	NA	NA	NA	NA	NA	NA	NA	NA	NA	NA	NA	NA	NA	NA	NA	NA	NA	NA	NA	NA	3448	0.05	0.324536	0.99887	0.00203005	0.0500002	1.9602e-06	64949	66.0558
5e-08	ukb-b-3291	finn-b-C3_LIP_ORAL_PHARYNX	Malignant neoplasm of lip, oral cavity and pharynx || id:finn-b-C3_LIP_ORAL_PHARYNX	Standard tea intake || id:ukb-b-3291	2	0.000693737	0.0120647	0.954146	NA	NA	NA	NA	NA	NA	NA	NA	NA	NA	NA	NA	NA	NA	NA	NA	NA	NA	NA	NA	218792	0.05	0.000575889	1.00069	0.00203005	0.05	1.23117e-07	64949	66.0558
5e-08	ukb-b-3291	finn-b-C3_LIP_ORAL_PHARYNX_EXALLC	"Malignant neoplasm of lip, oral cavity and pharynx" (all cancers excluded) || id:finn-b-C3_LIP_ORAL_PHARYNX_EXALLC	Standard tea intake || id:ukb-b-3291	2	0.000619289	0.0120819	0.95912	NA	NA	NA	NA	NA	NA	NA	NA	NA	NA	NA	NA	NA	NA	NA	NA	NA	NA	NA	NA	174132	0.05	0.000723589	1.00062	0.00203005	0.05	9.80883e-08	64949	66.0558
5e-08	ukb-b-3291	finn-b-C3_LARYNX	Malignant neoplasm of larynx || id:finn-b-C3_LARYNX	Standard tea intake || id:ukb-b-3291	2	-0.014527	0.0102076	0.154691	NA	NA	NA	NA	NA	NA	NA	NA	NA	NA	NA	NA	NA	NA	NA	NA	NA	NA	NA	NA	218792	0.05	0.000822699	0.985578	0.00203005	0.0500087	7.59415e-05	64949	66.0558
5e-08	ukb-b-3291	finn-b-C3_LARYNX_EXALLC	Malignant neoplasm of larynx (all cancers excluded) || id:finn-b-C3_LARYNX_EXALLC	Standard tea intake || id:ukb-b-3291	2	-0.014844	0.0102248	0.146565	NA	NA	NA	NA	NA	NA	NA	NA	NA	NA	NA	NA	NA	NA	NA	NA	NA	NA	NA	NA	174185	0.05	0.00103338	0.985266	0.00203005	0.0500091	7.92516e-05	64949	66.0558
5e-08	ukb-b-5209	ieu-b-89	Oral cavity and pharyngeal cancer || id:ieu-b-89	Added milk to standard tea || id:ukb-b-5209	1	NA	NA	NA	NA	NA	NA	NA	NA	NA	NA	NA	NA	NA	NA	NA	-0.0281658	1.46462	0.984657	NA	NA	NA	NA	NA	5425	0.05	0.460276	0.972227	0.000502911	0.0500615	0.000536516	64949	32.679
5e-08	ukb-b-5209	ieu-b-94	Oral cavity cancer || id:ieu-b-94	Added milk to standard tea || id:ukb-b-5209	1	NA	NA	NA	NA	NA	NA	NA	NA	NA	NA	NA	NA	NA	NA	NA	2.1406	1.80261	0.23503	NA	NA	NA	NA	NA	4151	0.05	0.294628	8.50457	0.000502911	NA	-17.5355	64949	32.679
5e-08	ukb-b-5209	ieu-b-96	Oropharyngeal cancer || id:ieu-b-96	Added milk to standard tea || id:ukb-b-5209	1	NA	NA	NA	NA	NA	NA	NA	NA	NA	NA	NA	NA	NA	NA	NA	-2.64759	1.88711	0.160621	NA	NA	NA	NA	NA	4018	0.05	0.271279	0.0708218	0.000502911	0.156184	0.887222	64949	32.679
5e-08	ukb-b-5209	ieu-b-90	Oral cavity and pharyngeal cancer || id:ieu-b-90	Added milk to standard tea || id:ukb-b-5209	1	NA	NA	NA	NA	NA	NA	NA	NA	NA	NA	NA	NA	NA	NA	NA	1.21113	1.57729	0.442572	NA	NA	NA	NA	NA	4671	0.05	0.501392	3.35728	0.000502911	0.166116	0.967886	64949	32.679
5e-08	ukb-b-5209	ieu-b-93	Oral cavity cancer || id:ieu-b-93	Added milk to standard tea || id:ukb-b-5209	1	NA	NA	NA	NA	NA	NA	NA	NA	NA	NA	NA	NA	NA	NA	NA	1.85895	1.91528	0.331753	NA	NA	NA	NA	NA	3464	0.05	0.327656	6.41697	0.000502911	0.855151	9.11283	64949	32.679
5e-08	ukb-b-5209	ieu-b-97	Oropharyngeal cancer || id:ieu-b-97	Added milk to standard tea || id:ukb-b-5209	1	NA	NA	NA	NA	NA	NA	NA	NA	NA	NA	NA	NA	NA	NA	NA	1.97161	1.99977	0.324175	NA	NA	NA	NA	NA	3448	0.05	0.324536	7.18222	0.000502911	0.996854	22.016	64949	32.679
5e-08	ukb-b-5209	finn-b-C3_LIP_ORAL_PHARYNX	Malignant neoplasm of lip, oral cavity and pharynx || id:finn-b-C3_LIP_ORAL_PHARYNX	Added milk to standard tea || id:ukb-b-5209	1	NA	NA	NA	NA	NA	NA	NA	NA	NA	NA	NA	NA	NA	NA	NA	3.01938	4.56005	0.507883	NA	NA	NA	NA	NA	218792	0.05	0.000575889	20.4786	0.000502911	0.999773	29.8791	64949	32.679
5e-08	ukb-b-5209	finn-b-C3_LIP_ORAL_PHARYNX_EXALLC	"Malignant neoplasm of lip, oral cavity and pharynx" (all cancers excluded) || id:finn-b-C3_LIP_ORAL_PHARYNX_EXALLC	Added milk to standard tea || id:ukb-b-5209	1	NA	NA	NA	NA	NA	NA	NA	NA	NA	NA	NA	NA	NA	NA	NA	3.03346	4.57132	0.506955	NA	NA	NA	NA	NA	174132	0.05	0.000723589	20.769	0.000502911	0.999927	33.1622	64949	32.679
5e-08	ukb-b-5209	finn-b-C3_LARYNX	Malignant neoplasm of larynx || id:finn-b-C3_LARYNX	Added milk to standard tea || id:ukb-b-5209	1	NA	NA	NA	NA	NA	NA	NA	NA	NA	NA	NA	NA	NA	NA	NA	4.06996	3.85309	0.290837	NA	NA	NA	NA	NA	218792	0.05	0.000822699	58.5549	0.000502911	NA	-184.261	64949	32.679
5e-08	ukb-b-5209	finn-b-C3_LARYNX_EXALLC	Malignant neoplasm of larynx (all cancers excluded) || id:finn-b-C3_LARYNX_EXALLC	Added milk to standard tea || id:ukb-b-5209	1	NA	NA	NA	NA	NA	NA	NA	NA	NA	NA	NA	NA	NA	NA	NA	4.12348	3.85872	0.285244	NA	NA	NA	NA	NA	174185	0.05	0.00103338	61.7738	0.000502911	NA	-124.476	64949	32.679
5e-07	ukb-b-8553	ieu-b-89	Oral cavity and pharyngeal cancer || id:ieu-b-89	|| id:ukb-b-8553	1	NA	NA	NA	NA	NA	NA	NA	NA	NA	NA	NA	NA	NA	NA	NA	2.12285	3.53809	0.548506	NA	NA	NA	NA	NA	5425	0.05	0.460276	8.35495	0.000415499	0.628113	5.22943	64949	26.9966
5e-07	ukb-b-8553	ieu-b-94	Oral cavity cancer || id:ieu-b-94	|| id:ukb-b-8553	1	NA	NA	NA	NA	NA	NA	NA	NA	NA	NA	NA	NA	NA	NA	NA	1.88698	4.36364	0.665427	NA	NA	NA	NA	NA	4151	0.05	0.294628	6.59942	0.000415499	0.997079	22.2456	64949	26.9966
5e-07	ukb-b-8553	ieu-b-96	Oropharyngeal cancer || id:ieu-b-96	|| id:ukb-b-8553	1	NA	NA	NA	NA	NA	NA	NA	NA	NA	NA	NA	NA	NA	NA	NA	2.5946	4.71745	0.582319	NA	NA	NA	NA	NA	4018	0.05	0.271279	13.3912	0.000415499	NA	-4.47225	64949	26.9966
5e-07	ukb-b-8553	ieu-b-90	Oral cavity and pharyngeal cancer || id:ieu-b-90	|| id:ukb-b-8553	1	NA	NA	NA	NA	NA	NA	NA	NA	NA	NA	NA	NA	NA	NA	NA	-0.353809	3.77396	0.925308	NA	NA	NA	NA	NA	4671	0.05	0.501392	0.702009	0.000415499	0.0570671	0.0614351	64949	26.9966
5e-07	ukb-b-8553	ieu-b-93	Oral cavity cancer || id:ieu-b-93	|| id:ukb-b-8553	1	NA	NA	NA	NA	NA	NA	NA	NA	NA	NA	NA	NA	NA	NA	NA	0.117936	4.59952	0.979544	NA	NA	NA	NA	NA	3464	0.05	0.327656	1.12517	0.000415499	0.050527	0.00459884	64949	26.9966
5e-07	ukb-b-8553	ieu-b-97	Oropharyngeal cancer || id:ieu-b-97	|| id:ukb-b-8553	1	NA	NA	NA	NA	NA	NA	NA	NA	NA	NA	NA	NA	NA	NA	NA	-0.825554	4.77642	0.862778	NA	NA	NA	NA	NA	3448	0.05	0.324536	0.437992	0.000415499	0.0691696	0.165532	64949	26.9966
5e-07	ukb-b-8553	finn-b-C3_LIP_ORAL_PHARYNX	Malignant neoplasm of lip, oral cavity and pharynx || id:finn-b-C3_LIP_ORAL_PHARYNX	|| id:ukb-b-8553	1	NA	NA	NA	NA	NA	NA	NA	NA	NA	NA	NA	NA	NA	NA	NA	-6.10321	11.428	0.593303	NA	NA	NA	NA	NA	218792	0.05	0.000575889	0.00223569	0.000415499	0.0559986	0.0521789	64949	26.9966
5e-07	ukb-b-8553	finn-b-C3_LIP_ORAL_PHARYNX_EXALLC	"Malignant neoplasm of lip, oral cavity and pharynx" (all cancers excluded) || id:finn-b-C3_LIP_ORAL_PHARYNX_EXALLC	|| id:ukb-b-8553	1	NA	NA	NA	NA	NA	NA	NA	NA	NA	NA	NA	NA	NA	NA	NA	-6.16807	11.4162	0.588998	NA	NA	NA	NA	NA	174132	0.05	0.000723589	0.00209527	0.000415499	0.0560021	0.0522089	64949	26.9966
5e-07	ukb-b-8553	finn-b-C3_LARYNX	Malignant neoplasm of larynx || id:finn-b-C3_LARYNX	|| id:ukb-b-8553	1	NA	NA	NA	NA	NA	NA	NA	NA	NA	NA	NA	NA	NA	NA	NA	0.967078	9.67668	0.920393	NA	NA	NA	NA	NA	218792	0.05	0.000822699	2.63025	0.000415499	0.0730344	0.198507	64949	26.9966
5e-07	ukb-b-8553	finn-b-C3_LARYNX_EXALLC	Malignant neoplasm of larynx (all cancers excluded) || id:finn-b-C3_LARYNX_EXALLC	|| id:ukb-b-8553	1	NA	NA	NA	NA	NA	NA	NA	NA	NA	NA	NA	NA	NA	NA	NA	0.825554	9.67668	0.932012	NA	NA	NA	NA	NA	174185	0.05	0.00103338	2.28315	0.000415499	0.0641938	0.122894	64949	26.9966
5e-08	ukb-b-11491	ieu-b-89	Oral cavity and pharyngeal cancer || id:ieu-b-89	Added milk to rooibos tea || id:ukb-b-11491	1	NA	NA	NA	NA	NA	NA	NA	NA	NA	NA	NA	NA	NA	NA	NA	-1.29625	5.18498	0.802587	NA	NA	NA	NA	NA	5425	0.05	0.460276	0.273557	0.00047249	0.179594	1.07713	64949	30.7013
5e-08	ukb-b-11491	ieu-b-94	Oral cavity cancer || id:ieu-b-94	Added milk to rooibos tea || id:ukb-b-11491	1	NA	NA	NA	NA	NA	NA	NA	NA	NA	NA	NA	NA	NA	NA	NA	2.49764	6.16507	0.685383	NA	NA	NA	NA	NA	4151	0.05	0.294628	12.1538	0.00047249	NA	-6.77658	64949	30.7013
5e-08	ukb-b-11491	ieu-b-96	Oropharyngeal cancer || id:ieu-b-96	Added milk to rooibos tea || id:ukb-b-11491	1	NA	NA	NA	NA	NA	NA	NA	NA	NA	NA	NA	NA	NA	NA	NA	-1.86533	7.24001	0.796683	NA	NA	NA	NA	NA	4018	0.05	0.271279	0.154845	0.00047249	0.12009	0.592014	64949	30.7013
5e-08	ukb-b-11491	ieu-b-90	Oral cavity and pharyngeal cancer || id:ieu-b-90	Added milk to rooibos tea || id:ukb-b-11491	1	NA	NA	NA	NA	NA	NA	NA	NA	NA	NA	NA	NA	NA	NA	NA	1.23301	5.56437	0.824632	NA	NA	NA	NA	NA	4671	0.05	0.501392	3.43156	0.00047249	0.163481	0.9465	64949	30.7013
5e-08	ukb-b-11491	ieu-b-93	Oral cavity cancer || id:ieu-b-93	Added milk to rooibos tea || id:ukb-b-11491	1	NA	NA	NA	NA	NA	NA	NA	NA	NA	NA	NA	NA	NA	NA	NA	-8.59949	7.24001	0.234923	NA	NA	NA	NA	NA	3464	0.05	0.327656	0.000184201	0.00047249	0.238501	1.55417	64949	30.7013
5e-08	ukb-b-11491	ieu-b-97	Oropharyngeal cancer || id:ieu-b-97	Added milk to rooibos tea || id:ukb-b-11491	1	NA	NA	NA	NA	NA	NA	NA	NA	NA	NA	NA	NA	NA	NA	NA	7.68263	6.79739	0.258378	NA	NA	NA	NA	NA	3448	0.05	0.324536	2170.32	0.00047249	NA	-3.14403	64949	30.7013
5e-08	ukb-b-11491	finn-b-C3_LIP_ORAL_PHARYNX	Malignant neoplasm of lip, oral cavity and pharynx || id:finn-b-C3_LIP_ORAL_PHARYNX	Added milk to rooibos tea || id:ukb-b-11491	1	NA	NA	NA	NA	NA	NA	NA	NA	NA	NA	NA	NA	NA	NA	NA	-7.89445	11.5081	0.49272	NA	NA	NA	NA	NA	218792	0.05	0.000575889	0.000372805	0.00047249	0.0568503	0.0595579	64949	30.7013
5e-08	ukb-b-11491	finn-b-C3_LIP_ORAL_PHARYNX_EXALLC	"Malignant neoplasm of lip, oral cavity and pharynx" (all cancers excluded) || id:finn-b-C3_LIP_ORAL_PHARYNX_EXALLC	Added milk to rooibos tea || id:ukb-b-11491	1	NA	NA	NA	NA	NA	NA	NA	NA	NA	NA	NA	NA	NA	NA	NA	-7.78064	11.565	0.501092	NA	NA	NA	NA	NA	174132	0.05	0.000723589	0.000417746	0.00047249	0.0568517	0.0595701	64949	30.7013
5e-08	ukb-b-11491	finn-b-C3_LARYNX	Malignant neoplasm of larynx || id:finn-b-C3_LARYNX	Added milk to rooibos tea || id:ukb-b-11491	1	NA	NA	NA	NA	NA	NA	NA	NA	NA	NA	NA	NA	NA	NA	NA	-3.6611	9.75978	0.70757	NA	NA	NA	NA	NA	218792	0.05	0.000822699	0.0257041	0.00047249	0.0593134	0.0808584	64949	30.7013
5e-08	ukb-b-11491	finn-b-C3_LARYNX_EXALLC	Malignant neoplasm of larynx (all cancers excluded) || id:finn-b-C3_LARYNX_EXALLC	Added milk to rooibos tea || id:ukb-b-11491	1	NA	NA	NA	NA	NA	NA	NA	NA	NA	NA	NA	NA	NA	NA	NA	-3.46193	9.81669	0.724346	NA	NA	NA	NA	NA	174185	0.05	0.00103338	0.0313693	0.00047249	0.0592084	0.079951	64949	30.7013
5e-08	ukb-b-17988	ieu-b-89	Oral cavity and pharyngeal cancer || id:ieu-b-89	Tea consumed || id:ukb-b-17988	1	NA	NA	NA	NA	NA	NA	NA	NA	NA	NA	NA	NA	NA	NA	NA	4.10643	3.11522	0.187443	NA	NA	NA	NA	NA	5425	0.05	0.460276	60.7294	0.000474196	NA	-30.6138	64949	30.8122
5e-08	ukb-b-17988	ieu-b-94	Oral cavity cancer || id:ieu-b-94	Tea consumed || id:ukb-b-17988	1	NA	NA	NA	NA	NA	NA	NA	NA	NA	NA	NA	NA	NA	NA	NA	5.45164	3.82323	0.15389	NA	NA	NA	NA	NA	4151	0.05	0.294628	233.139	0.000474196	NA	-3.45328	64949	30.8122
5e-08	ukb-b-17988	ieu-b-96	Oropharyngeal cancer || id:ieu-b-96	Tea consumed || id:ukb-b-17988	1	NA	NA	NA	NA	NA	NA	NA	NA	NA	NA	NA	NA	NA	NA	NA	-0.141601	4.17723	0.972958	NA	NA	NA	NA	NA	4018	0.05	0.271279	0.867968	0.000474196	0.0508125	0.00708927	64949	30.8122
5e-08	ukb-b-17988	ieu-b-90	Oral cavity and pharyngeal cancer || id:ieu-b-90	Tea consumed || id:ukb-b-17988	1	NA	NA	NA	NA	NA	NA	NA	NA	NA	NA	NA	NA	NA	NA	NA	-2.54882	3.25682	0.433857	NA	NA	NA	NA	NA	4671	0.05	0.501392	0.0781741	0.000474196	0.696863	6.12736	64949	30.8122
5e-08	ukb-b-17988	ieu-b-93	Oral cavity cancer || id:ieu-b-93	Tea consumed || id:ukb-b-17988	1	NA	NA	NA	NA	NA	NA	NA	NA	NA	NA	NA	NA	NA	NA	NA	-0.0708005	3.96483	0.985753	NA	NA	NA	NA	NA	3464	0.05	0.327656	0.931648	0.000474196	0.0502029	0.0017709	64949	30.8122
5e-08	ukb-b-17988	ieu-b-97	Oropharyngeal cancer || id:ieu-b-97	Tea consumed || id:ukb-b-17988	1	NA	NA	NA	NA	NA	NA	NA	NA	NA	NA	NA	NA	NA	NA	NA	-3.96483	4.10643	0.334286	NA	NA	NA	NA	NA	3448	0.05	0.324536	0.0189713	0.000474196	0.214552	1.36003	64949	30.8122
5e-08	ukb-b-17988	finn-b-C3_LIP_ORAL_PHARYNX	Malignant neoplasm of lip, oral cavity and pharynx || id:finn-b-C3_LIP_ORAL_PHARYNX	Tea consumed || id:ukb-b-17988	1	NA	NA	NA	NA	NA	NA	NA	NA	NA	NA	NA	NA	NA	NA	NA	-8.3757	9.16866	0.360973	NA	NA	NA	NA	NA	218792	0.05	0.000575889	0.0002304	0.000474196	0.0568771	0.05979	64949	30.8122
5e-08	ukb-b-17988	finn-b-C3_LIP_ORAL_PHARYNX_EXALLC	"Malignant neoplasm of lip, oral cavity and pharynx" (all cancers excluded) || id:finn-b-C3_LIP_ORAL_PHARYNX_EXALLC	Tea consumed || id:ukb-b-17988	1	NA	NA	NA	NA	NA	NA	NA	NA	NA	NA	NA	NA	NA	NA	NA	-8.94918	9.1899	0.330153	NA	NA	NA	NA	NA	174132	0.05	0.000723589	0.000129844	0.000474196	0.0568805	0.0598197	64949	30.8122
5e-08	ukb-b-17988	finn-b-C3_LARYNX	Malignant neoplasm of larynx || id:finn-b-C3_LARYNX	Tea consumed || id:ukb-b-17988	1	NA	NA	NA	NA	NA	NA	NA	NA	NA	NA	NA	NA	NA	NA	NA	-7.50485	7.73141	0.3317	NA	NA	NA	NA	NA	218792	0.05	0.000822699	0.000550408	0.000474196	0.0598397	0.0854017	64949	30.8122
5e-08	ukb-b-17988	finn-b-C3_LARYNX_EXALLC	Malignant neoplasm of larynx (all cancers excluded) || id:finn-b-C3_LARYNX_EXALLC	Tea consumed || id:ukb-b-17988	1	NA	NA	NA	NA	NA	NA	NA	NA	NA	NA	NA	NA	NA	NA	NA	-8.11373	7.75265	0.295295	NA	NA	NA	NA	NA	174185	0.05	0.00103338	0.000299399	0.000474196	0.0598488	0.0854808	64949	30.8122
5e-06	ukb-b-3291	ieu-b-89	Oral cavity and pharyngeal cancer || id:ieu-b-89	|| id:ukb-b-3291	14	0.00467522	0.00242964	0.0543235	-0.00325934	0.00662967	0.631851	0.00621362	0.00551556	0.280295	0.00296454	0.00336467	0.378276	0.00458953	0.00445227	0.321419	NA	NA	NA	0.00467522	0.00194693	0.032005	raw	0.842	5425	0.05	0.460276	1.00469	0.00626029	0.0500211	0.000184481	64949	29.219
5e-06	ukb-b-3291	ieu-b-94	Oral cavity cancer || id:ieu-b-94	|| id:ukb-b-3291	14	0.00418093	0.0029715	0.159424	0.0027489	0.00807301	0.739363	0.00253622	0.00651623	0.703417	0.00438518	0.00410508	0.285415	0.00318882	0.00548321	0.570809	NA	NA	NA	0.00418093	0.00248711	0.116609	raw	0.769	4151	0.05	0.294628	1.00419	0.00626029	0.0500108	9.45649e-05	64949	29.219
5e-06	ukb-b-3291	ieu-b-96	Oropharyngeal cancer || id:ieu-b-96	|| id:ukb-b-3291	14	0.00351869	0.00360177	0.328602	-0.00872243	0.00946059	0.374706	-0.00326656	0.00853398	0.708074	-0.00011801	0.00476542	0.980243	-0.00120749	0.00675809	0.860948	NA	NA	NA	0.00351869	0.00360177	0.346432	raw	0.23	4018	0.05	0.271279	1.00352	0.00626029	0.0500071	6.16657e-05	64949	29.219
5e-06	ukb-b-3291	ieu-b-90	Oral cavity and pharyngeal cancer || id:ieu-b-90	|| id:ukb-b-3291	14	-0.00247237	0.00271385	0.362285	0.00539905	0.00721197	0.468504	0.00266168	0.00649362	0.68856	9.44529e-05	0.00349135	0.978417	0.00402468	0.00496943	0.43258	NA	NA	NA	-0.00247237	0.00271385	0.378868	raw	0.255	4671	0.05	0.501392	0.997531	0.00626029	0.0500051	4.46861e-05	64949	29.219
5e-06	ukb-b-3291	ieu-b-93	Oral cavity cancer || id:ieu-b-93	|| id:ukb-b-3291	14	-0.000870293	0.00312483	0.780622	0.00965274	0.00823499	0.263878	-0.00117138	0.00781135	0.883099	0.000800384	0.0043007	0.852362	-0.00197518	0.00590571	0.743373	NA	NA	NA	-0.000870293	0.00312483	0.785002	raw	0.36	3464	0.05	0.327656	0.99913	0.00626029	0.0500004	3.61728e-06	64949	29.219
5e-06	ukb-b-3291	ieu-b-97	Oropharyngeal cancer || id:ieu-b-97	|| id:ukb-b-3291	14	-0.00399603	0.00313142	0.201917	0.000898236	0.0084308	0.916913	-0.00189217	0.00730548	0.799685	-0.000745945	0.0042635	0.86111	-0.000516294	0.00558492	0.927754	NA	NA	NA	-0.00399603	0.00293177	0.196023	raw	0.57	3448	0.05	0.324536	0.996012	0.00626029	0.0500086	7.54528e-05	64949	29.219
5e-06	ukb-b-3291	finn-b-C3_LIP_ORAL_PHARYNX	Malignant neoplasm of lip, oral cavity and pharynx || id:finn-b-C3_LIP_ORAL_PHARYNX	|| id:ukb-b-3291	14	-0.00226853	0.00785469	0.772725	0.0197509	0.0208476	0.362126	0.00682185	0.0146834	0.649906	-2.52954e-05	0.00983067	0.997947	0.00279077	0.0124342	0.825902	NA	NA	NA	-0.00226853	0.00785469	0.777279	raw	0.215	218792	0.05	0.000575889	0.997734	0.00626029	0.0500005	4.0478e-06	64949	29.219
5e-06	ukb-b-3291	finn-b-C3_LIP_ORAL_PHARYNX_EXALLC	"Malignant neoplasm of lip, oral cavity and pharynx" (all cancers excluded) || id:finn-b-C3_LIP_ORAL_PHARYNX_EXALLC	|| id:ukb-b-3291	14	-0.00246526	0.00781877	0.752534	0.0194996	0.0207578	0.366058	0.00584755	0.0153603	0.70958	-0.00113928	0.0100304	0.909569	0.00181747	0.0117856	0.879812	NA	NA	NA	-0.00246526	0.00781877	0.757538	raw	0.248	174132	0.05	0.000723589	0.997538	0.00626029	0.0500005	4.77866e-06	64949	29.219
5e-06	ukb-b-3291	finn-b-C3_LARYNX	Malignant neoplasm of larynx || id:finn-b-C3_LARYNX	|| id:ukb-b-3291	14	-0.00625483	0.00574516	0.27628	-0.0132811	0.0154236	0.406066	-0.012051	0.0123608	0.347387	-0.0126386	0.00765977	0.0989447	-0.0136676	0.0103047	0.207555	NA	NA	NA	-0.00625483	0.00498218	0.231417	raw	0.732	218792	0.05	0.000822699	0.993765	0.00626029	0.050005	4.37754e-05	64949	29.219
5e-06	ukb-b-3291	finn-b-C3_LARYNX_EXALLC	Malignant neoplasm of larynx (all cancers excluded) || id:finn-b-C3_LARYNX_EXALLC	|| id:ukb-b-3291	14	-0.00643887	0.00575582	0.26328	-0.0134836	0.0154632	0.400332	-0.0116721	0.0121614	0.354687	-0.012874	0.00761469	0.0908982	-0.013826	0.00950861	0.169645	NA	NA	NA	-0.00643887	0.00520076	0.237586	raw	0.667	174185	0.05	0.00103338	0.993582	0.00626029	0.0500053	4.63711e-05	64949	29.219
5e-06	ukb-b-5209	ieu-b-89	Oral cavity and pharyngeal cancer || id:ieu-b-89	|| id:ukb-b-5209	17	0.484721	0.404705	0.231029	-0.625468	1.37308	0.655259	0.736344	0.984998	0.465572	0.73079	0.517571	0.157962	0.752663	0.936247	0.433229	NA	NA	NA	0.484721	0.303408	0.129693	raw	0.919	5425	0.05	0.460276	1.62372	0.00613764	0.300583	2.06283	64949	23.5873
5e-06	ukb-b-5209	ieu-b-94	Oral cavity cancer || id:ieu-b-94	|| id:ukb-b-5209	17	0.752961	0.496035	0.129025	-0.141969	1.67448	0.933554	1.8012	1.0994	0.120862	1.08035	0.669409	0.106553	1.94736	1.04333	0.0804109	NA	NA	NA	0.752961	0.450158	0.113831	raw	0.672	4151	0.05	0.294628	2.12328	0.00613764	0.557269	4.42662	64949	23.5873
5e-06	ukb-b-5209	ieu-b-96	Oropharyngeal cancer || id:ieu-b-96	|| id:ukb-b-5209	17	0.134068	0.537035	0.802862	-0.482015	1.83379	0.796241	0.418092	1.2974	0.751433	0.39012	0.737369	0.596757	0.372405	1.21493	0.763158	NA	NA	NA	0.134068	0.523126	0.800999	raw	0.511	4018	0.05	0.271279	1.14347	0.00613764	0.0607579	0.0933234	64949	23.5873
5e-06	ukb-b-5209	ieu-b-90	Oral cavity and pharyngeal cancer || id:ieu-b-90	|| id:ukb-b-5209	17	-0.642414	0.417359	0.123747	-0.217447	1.35527	0.874671	0.718051	1.14577	0.539699	-0.605769	0.586843	0.301954	0.795808	1.08984	0.475823	NA	NA	NA	-0.642414	0.38894	0.118081	raw	0.616	4671	0.05	0.501392	0.526021	0.00613764	0.417437	3.06686	64949	23.5873
5e-06	ukb-b-5209	ieu-b-93	Oral cavity cancer || id:ieu-b-93	|| id:ukb-b-5209	17	-0.356735	0.503961	0.479031	1.96948	1.58788	0.233909	-0.409412	1.19884	0.737165	-0.490229	0.69133	0.478256	-0.409412	1.2321	0.743986	NA	NA	NA	-0.356735	0.434192	0.423375	raw	0.742	3464	0.05	0.327656	0.699958	0.00613764	0.112768	0.531575	64949	23.5873
5e-06	ukb-b-5209	ieu-b-97	Oropharyngeal cancer || id:ieu-b-97	|| id:ukb-b-5209	17	-0.770996	0.603043	0.20107	-2.674	2.05239	0.212267	-2.17284	1.67352	0.212565	-1.4961	0.77957	0.0549677	-2.17284	1.6341	0.202269	NA	NA	NA	-0.770996	0.603043	0.219305	raw	0.198	3448	0.05	0.324536	0.462552	0.00613764	0.313158	2.16738	64949	23.5873
5e-06	ukb-b-5209	finn-b-C3_LIP_ORAL_PHARYNX	Malignant neoplasm of lip, oral cavity and pharynx || id:finn-b-C3_LIP_ORAL_PHARYNX	|| id:ukb-b-5209	20	-1.88311	1.05318	0.0737721	-0.938221	2.63242	0.725677	-2.79865	2.39856	0.257725	-2.12778	1.44794	0.141692	-2.65253	2.27536	0.258137	NA	NA	NA	-1.88311	0.901747	0.0504704	raw	0.823	218792	0.05	0.000575889	0.152117	0.00715273	0.126949	0.648438	64949	23.3879
5e-06	ukb-b-5209	finn-b-C3_LIP_ORAL_PHARYNX_EXALLC	"Malignant neoplasm of lip, oral cavity and pharynx" (all cancers excluded) || id:finn-b-C3_LIP_ORAL_PHARYNX_EXALLC	|| id:ukb-b-5209	20	-1.92316	1.05397	0.0680495	-1.00039	2.63207	0.708336	-2.91686	2.41288	0.241542	-2.42907	1.47359	0.0992702	-2.7186	2.24343	0.240441	NA	NA	NA	-1.92316	0.903655	0.0466281	raw	0.802	174132	0.05	0.000723589	0.146144	0.00715273	0.128084	0.657754	64949	23.3879
5e-06	ukb-b-5209	finn-b-C3_LARYNX	Malignant neoplasm of larynx || id:finn-b-C3_LARYNX	|| id:ukb-b-5209	20	0.781135	0.888849	0.379501	-1.89529	2.21274	0.402963	1.9104	2.19884	0.395787	1.03771	1.21491	0.393025	1.09623	1.98296	0.586831	NA	NA	NA	0.781135	0.719258	0.291054	raw	0.865	218792	0.05	0.000822699	2.18395	0.00715273	0.268882	1.8018	64949	23.3879
5e-06	ukb-b-5209	finn-b-C3_LARYNX_EXALLC	Malignant neoplasm of larynx (all cancers excluded) || id:finn-b-C3_LARYNX_EXALLC	|| id:ukb-b-5209	20	0.733234	0.889932	0.409985	-1.95598	2.21586	0.389026	2.15249	2.17257	0.334254	1.13295	1.27187	0.373048	1.076	2.01061	0.598747	NA	NA	NA	0.733234	0.720786	0.321805	raw	0.878	174185	0.05	0.00103338	2.0818	0.00715273	0.232276	1.50364	64949	23.3879
5e-06	ukb-b-8553	ieu-b-89	Oral cavity and pharyngeal cancer || id:ieu-b-89	|| id:ukb-b-8553	16	1.27011	1.28726	0.323799	4.53705	3.6599	0.235478	1.70139	2.70043	0.538147	1.59478	1.52356	0.29522	1.37439	2.62585	0.608337	NA	NA	NA	1.27011	1.28726	0.339449	outliers corrected	0.044	5425	0.05	0.460276	3.56124	0.00559389	0.978448	15.8616	64949	22.8291
5e-06	ukb-b-8553	ieu-b-94	Oral cavity cancer || id:ieu-b-94	|| id:ukb-b-8553	16	1.01938	1.22296	0.404545	1.97116	3.50664	0.582922	0.217713	3.18564	0.946416	0.380682	1.72107	0.824945	0.217713	2.94251	0.941997	NA	NA	NA	1.01938	1.19467	0.406928	raw	0.482	4151	0.05	0.294628	2.77147	0.00559389	0.854674	9.10021	64949	22.8291
5e-06	ukb-b-8553	ieu-b-96	Oropharyngeal cancer || id:ieu-b-96	|| id:ukb-b-8553	16	1.59594	1.7386	0.358646	7.69375	4.73943	0.126809	1.05714	3.94026	0.79213	1.29113	1.95753	0.50953	1.05714	3.70689	0.779405	NA	NA	NA	1.59594	1.7386	0.373171	raw	0.033	4018	0.05	0.271279	4.93298	0.00559389	1	56.5986	64949	22.8291
5e-06	ukb-b-8553	ieu-b-90	Oral cavity and pharyngeal cancer || id:ieu-b-90	|| id:ukb-b-8553	16	0.271196	1.01408	0.789138	0.856899	2.81264	0.765107	-0.0191144	2.44623	0.993869	-0.0789456	1.41024	0.955358	-0.0667125	2.50792	0.979129	NA	NA	NA	0.271196	0.983474	0.7865	raw	0.531	4671	0.05	0.501392	1.31153	0.00559389	0.106906	0.483009	64949	22.8291
5e-06	ukb-b-8553	ieu-b-93	Oral cavity cancer || id:ieu-b-93	|| id:ukb-b-8553	16	1.55034	1.23754	0.210293	2.00973	3.41782	0.565887	1.55788	2.50634	0.543553	1.76398	1.63949	0.281959	1.6878	2.78627	0.553732	NA	NA	NA	1.55034	0.814927	0.0764917	raw	0.972	3464	0.05	0.327656	4.71309	0.00559389	0.999864	31.3696	64949	22.8291
5e-06	ukb-b-8553	ieu-b-97	Oropharyngeal cancer || id:ieu-b-97	|| id:ukb-b-8553	16	-0.845912	1.27685	0.50765	-0.434609	3.57922	0.905079	-1.24986	3.3133	0.711289	-1.28646	1.7721	0.467867	-1.45497	2.98944	0.633505	NA	NA	NA	-0.845912	1.25399	0.510209	raw	0.484	3448	0.05	0.324536	0.429166	0.00559389	0.332059	2.32578	64949	22.8291
5e-06	ukb-b-8553	finn-b-C3_LIP_ORAL_PHARYNX	Malignant neoplasm of lip, oral cavity and pharynx || id:finn-b-C3_LIP_ORAL_PHARYNX	|| id:ukb-b-8553	17	-0.134017	2.90008	0.963142	-6.40711	6.76299	0.35846	1.31843	7.47729	0.862252	1.05465	3.68838	0.774926	2.87711	7.32396	0.699625	NA	NA	NA	-0.134017	2.90008	0.963714	raw	0.181	218792	0.05	0.000575889	0.874576	0.00595755	0.0513532	0.0118037	64949	22.8911
5e-06	ukb-b-8553	finn-b-C3_LIP_ORAL_PHARYNX_EXALLC	"Malignant neoplasm of lip, oral cavity and pharynx" (all cancers excluded) || id:finn-b-C3_LIP_ORAL_PHARYNX_EXALLC	|| id:ukb-b-8553	17	-0.249784	2.92738	0.932002	-6.53449	6.82685	0.353653	1.22103	7.17471	0.866998	0.960795	3.84896	0.802878	2.63383	7.80022	0.740008	NA	NA	NA	-0.249784	2.92738	0.93306	raw	0.167	174132	0.05	0.000723589	0.778969	0.00595755	0.05421	0.0366593	64949	22.8911
5e-06	ukb-b-8553	finn-b-C3_LARYNX	Malignant neoplasm of larynx || id:finn-b-C3_LARYNX	|| id:ukb-b-8553	17	-1.98708	2.28523	0.384556	-2.02593	5.50958	0.718226	-6.5363	6.2725	0.312876	-3.2112	3.18179	0.312858	-5.17555	6.12517	0.410588	NA	NA	NA	-1.98708	2.28523	0.397414	raw	0.337	218792	0.05	0.000822699	0.137095	0.00595755	0.145405	0.79945	64949	22.8911
5e-06	ukb-b-8553	finn-b-C3_LARYNX_EXALLC	Malignant neoplasm of larynx (all cancers excluded) || id:finn-b-C3_LARYNX_EXALLC	|| id:ukb-b-8553	17	-2.11254	2.27809	0.353756	-2.09547	5.49088	0.708089	-6.57735	6.10815	0.297532	-3.25756	3.14765	0.300707	-5.22081	5.37354	0.345721	NA	NA	NA	-2.11254	2.27809	0.367534	raw	0.322	174185	0.05	0.00103338	0.120931	0.00595755	0.149152	0.829992	64949	22.8911
5e-06	ukb-b-11491	ieu-b-89	Oral cavity and pharyngeal cancer || id:ieu-b-89	|| id:ukb-b-11491	12	0.734111	1.90252	0.699599	6.67186	3.70066	0.101574	6.88363	4.98538	0.19476	-0.442327	2.38779	0.853037	-4.30745	4.23827	0.331308	NA	NA	NA	0.734111	1.90252	0.706957	raw	0.266	5425	0.05	0.460276	2.08363	0.00443927	0.474495	3.59422	64949	24.1295
5e-06	ukb-b-11491	ieu-b-94	Oral cavity cancer || id:ieu-b-94	|| id:ukb-b-11491	12	1.1582	2.63822	0.660655	6.5875	5.58902	0.265823	-0.675553	5.2499	0.899934	0.429439	3.00153	0.886232	-0.550716	4.1942	0.897906	NA	NA	NA	1.1582	2.63822	0.669154	raw	0.089	4151	0.05	0.294628	3.18421	0.00443927	0.904733	10.6861	64949	24.1295
5e-06	ukb-b-11491	ieu-b-96	Oropharyngeal cancer || id:ieu-b-96	|| id:ukb-b-11491	12	1.29051	2.57301	0.61598	11.8625	4.85597	0.0346779	8.36021	6.28546	0.210409	2.23152	3.23257	0.489989	8.14637	6.26058	0.219779	NA	NA	NA	1.29051	2.57301	0.625866	raw	0.206	4018	0.05	0.271279	3.63462	0.00443927	0.976751	15.6089	64949	24.1295
5e-06	ukb-b-11491	ieu-b-90	Oral cavity and pharyngeal cancer || id:ieu-b-90	|| id:ukb-b-11491	12	2.01894	2.20742	0.360393	7.2193	4.62626	0.149702	-3.46272	4.68983	0.475762	0.777497	2.73649	0.776317	-2.5239	4.36598	0.574852	NA	NA	NA	2.01894	2.20742	0.380005	raw	0.116	4671	0.05	0.501392	7.53037	0.00443927	0.999699	29.0576	64949	24.1295
5e-06	ukb-b-11491	ieu-b-93	Oral cavity cancer || id:ieu-b-93	|| id:ukb-b-11491	12	0.499397	2.34965	0.831685	3.1158	5.25385	0.566316	-5.82888	5.38299	0.302047	-0.497098	3.04965	0.870517	-5.12607	5.54944	0.375456	NA	NA	NA	0.499397	2.34965	0.835572	raw	0.297	3464	0.05	0.327656	1.64773	0.00443927	0.174036	1.03211	64949	24.1295
5e-06	ukb-b-11491	ieu-b-97	Oropharyngeal cancer || id:ieu-b-97	|| id:ukb-b-11491	12	3.80635	2.55582	0.136412	10.8729	5.1043	0.0590068	-3.21698	6.53184	0.632043	2.64373	3.33052	0.427318	7.1141	5.85503	0.249787	NA	NA	NA	3.80635	2.55582	0.164514	raw	0.209	3448	0.05	0.324536	44.9858	0.00443927	NA	-34.025	64949	24.1295
5e-06	ukb-b-11491	finn-b-C3_LIP_ORAL_PHARYNX	Malignant neoplasm of lip, oral cavity and pharynx || id:finn-b-C3_LIP_ORAL_PHARYNX	|| id:ukb-b-11491	17	-11.5858	4.12298	0.00495314	-24.0366	7.61293	0.00650795	-19.321	8.55492	0.0382361	-12.8224	5.55675	0.0210251	-13.3449	7.04106	0.0762678	NA	NA	NA	-11.5858	3.1978	0.00228512	raw	0.898	218792	0.05	0.000575889	9.2968e-06	0.00629226	0.144703	0.793724	64949	24.1853
5e-06	ukb-b-11491	finn-b-C3_LIP_ORAL_PHARYNX_EXALLC	"Malignant neoplasm of lip, oral cavity and pharynx" (all cancers excluded) || id:finn-b-C3_LIP_ORAL_PHARYNX_EXALLC	|| id:ukb-b-11491	17	-11.6329	4.12151	0.00476547	-24.2132	7.60148	0.00614573	-19.8277	9.32612	0.0494152	-12.9099	5.69056	0.0232891	-13.5283	7.23503	0.0799187	NA	NA	NA	-11.6329	3.21804	0.00232492	raw	0.88	174132	0.05	0.000723589	8.86985e-06	0.00629226	0.144732	0.79396	64949	24.1853
5e-06	ukb-b-11491	finn-b-C3_LARYNX	Malignant neoplasm of larynx || id:finn-b-C3_LARYNX	|| id:ukb-b-11491	17	-2.90195	3.49742	0.406686	-6.24308	6.57776	0.357602	2.99869	8.50079	0.728877	0.749529	4.97191	0.880171	1.96301	7.13709	0.786803	NA	NA	NA	-2.90195	3.48715	0.417553	raw	0.463	218792	0.05	0.000822699	0.054916	0.00629226	0.171692	1.01311	64949	24.1853
5e-06	ukb-b-11491	finn-b-C3_LARYNX_EXALLC	Malignant neoplasm of larynx (all cancers excluded) || id:finn-b-C3_LARYNX_EXALLC	|| id:ukb-b-11491	17	-2.92787	3.49757	0.402528	-6.58592	6.57042	0.332067	2.31606	8.32285	0.784364	0.429925	4.98972	0.931338	1.27461	6.8255	0.854209	NA	NA	NA	-2.92787	3.49757	0.414857	raw	0.444	174185	0.05	0.00103338	0.0535109	0.00629226	0.172112	1.01652	64949	24.1853
5e-06	ukb-b-17988	ieu-b-89	Oral cavity and pharyngeal cancer || id:ieu-b-89	|| id:ukb-b-17988	11	0.381755	1.17157	0.744539	-3.2008	3.82347	0.424182	0.0415531	2.52044	0.987171	0.167675	1.49313	0.910588	0.0767865	2.59379	0.976965	NA	NA	NA	0.381755	0.832902	0.656505	raw	0.875	5425	0.05	0.460276	1.46485	0.00389909	0.145427	0.799632	64949	23.1078
5e-06	ukb-b-17988	ieu-b-94	Oral cavity cancer || id:ieu-b-94	|| id:ukb-b-17988	11	0.452899	1.43363	0.75207	-4.40047	4.58436	0.362187	-0.727929	3.42961	0.836177	0.563311	1.92005	0.769229	-0.580216	3.16064	0.858015	NA	NA	NA	0.452899	1.30498	0.735744	raw	0.608	4151	0.05	0.294628	1.57287	0.00389909	0.151674	0.850528	64949	23.1078
5e-06	ukb-b-17988	ieu-b-96	Oropharyngeal cancer || id:ieu-b-96	|| id:ukb-b-17988	11	-0.00205882	1.56633	0.998951	-3.82757	5.19314	0.479868	-0.170498	3.50387	0.962148	-0.183761	2.06528	0.929101	-0.221592	3.19783	0.946121	NA	NA	NA	-0.00205882	1.23231	0.9987	raw	0.79	4018	0.05	0.271279	0.997943	0.00389909	0.0500015	1.31154e-05	64949	23.1078
5e-06	ukb-b-17988	ieu-b-90	Oral cavity and pharyngeal cancer || id:ieu-b-90	|| id:ukb-b-17988	12	-0.398498	1.18399	0.736439	0.863791	3.34983	0.801743	2.14352	2.8237	0.463739	0.138417	1.62886	0.932279	1.78621	2.88766	0.548796	NA	NA	NA	-0.398498	1.15574	0.736748	raw	0.474	4671	0.05	0.501392	0.671328	0.00422537	0.144844	0.794871	64949	22.9619
5e-06	ukb-b-17988	ieu-b-93	Oral cavity cancer || id:ieu-b-93	|| id:ukb-b-17988	12	0.851542	1.45413	0.558143	0.977905	4.07862	0.815356	4.05902	3.48047	0.268185	0.794021	2.03894	0.696958	1.10193	3.41606	0.753067	NA	NA	NA	0.851542	1.31775	0.531395	raw	0.636	3464	0.05	0.327656	2.34326	0.00422537	0.4614	3.47036	64949	22.9619
5e-06	ukb-b-17988	ieu-b-97	Oropharyngeal cancer || id:ieu-b-97	|| id:ukb-b-17988	12	-1.89498	1.48634	0.202333	0.155912	4.13072	0.970634	-2.26483	3.71031	0.553989	-2.29255	2.03656	0.260294	-2.56363	3.27676	0.450513	NA	NA	NA	-1.89498	1.3856	0.198721	raw	0.578	3448	0.05	0.324536	0.150321	0.00422537	0.708512	6.29505	64949	22.9619
5e-06	ukb-b-17988	finn-b-C3_LIP_ORAL_PHARYNX	Malignant neoplasm of lip, oral cavity and pharynx || id:finn-b-C3_LIP_ORAL_PHARYNX	|| id:ukb-b-17988	16	-3.53705	2.84196	0.213285	-3.30414	5.59948	0.56454	-4.50499	6.41984	0.493593	-3.97427	3.90774	0.309141	-4.50499	5.06925	0.3882	NA	NA	NA	-3.53705	2.10979	0.114352	raw	0.932	218792	0.05	0.000575889	0.029099	0.00564694	0.129752	0.671437	64949	23.0469
5e-06	ukb-b-17988	finn-b-C3_LIP_ORAL_PHARYNX_EXALLC	"Malignant neoplasm of lip, oral cavity and pharynx" (all cancers excluded) || id:finn-b-C3_LIP_ORAL_PHARYNX_EXALLC	|| id:ukb-b-17988	16	-3.58045	2.85093	0.209156	-3.13813	5.62609	0.585803	-4.86861	6.575	0.470446	-3.69631	3.8114	0.332144	-4.52516	5.21721	0.399412	NA	NA	NA	-3.58045	2.12912	0.113331	raw	0.936	174132	0.05	0.000723589	0.0278632	0.00564694	0.129983	0.673338	64949	23.0469
5e-06	ukb-b-17988	finn-b-C3_LARYNX	Malignant neoplasm of larynx || id:finn-b-C3_LARYNX	|| id:ukb-b-17988	16	-0.609086	2.40191	0.799817	-1.01974	4.72789	0.832343	-2.02845	5.38462	0.711663	-0.202401	3.39168	0.952414	-0.909432	4.02985	0.824501	NA	NA	NA	-0.609086	2.27543	0.792592	raw	0.61	218792	0.05	0.000822699	0.543847	0.00564694	0.0745633	0.211519	64949	23.0469
5e-06	ukb-b-17988	finn-b-C3_LARYNX_EXALLC	Malignant neoplasm of larynx (all cancers excluded) || id:finn-b-C3_LARYNX_EXALLC	|| id:ukb-b-17988	16	-0.65252	2.41029	0.786604	-0.858722	4.75396	0.859245	-2.14958	5.10564	0.67971	-0.320542	3.42555	0.925448	-0.850299	4.34943	0.847628	NA	NA	NA	-0.65252	2.30399	0.780884	raw	0.599	174185	0.05	0.00103338	0.520732	0.00564694	0.0771537	0.233522	64949	23.0469
Table S1.Results of univariate MR analysis. NSNP: Number of SNPs; B: Beta; SE: Standard Error; Pval: P value; OR:Odds ratio; NCP: Non central parameter.
