# Supplementary material for: Causal association between tea consumption and head and neck cancer: a Mendelian randomization study
Source: Royal Society of Chemistry journal article supplement (doi:10.1039/d3fo04017h), 2024-01-01
Supplement: d3fo04017h3.xlsx [file d3fo04017h3.xlsx]

## Sheet: Sheet1
GWAS id of outcome	Beta of exposure	SE of exposure	Pval of exposure	Samplesize of exposure	effect allele of exposure	other allele of exposure	EAF of exposure	Exposure	GWAS id of exposure	SNP	Chromosome of exposure	Position of exposure	Position-500kb/1000kb	Position+500kb/1000kb	NSNP	PP.H0.abf	PP.H1.abf	PP.H2.abf	PP.H3.abf	PP.H4.abf
ieu-b-89	5.64296	0.934115	1.5e-09	64949	C	T	0.592157	Standard tea intake || id:ukb-b-3291	ukb-b-3291	rs2389763	7	17307847	16807847	17807847	3081	0.440038	0.136731	0.299747	0.0931086	0.0303758
ieu-b-94	5.64296	0.934115	1.5e-09	64949	C	T	1.59216	Standard tea intake || id:ukb-b-3292	ukb-b-3291	rs2389763	7	17307847	16807847	17807847	3081	0.565042	0.175573	0.183786	0.0570885	0.0185108
ieu-b-96	5.64296	0.934115	1.5e-09	64949	C	T	2.59216	Standard tea intake || id:ukb-b-3293	ukb-b-3291	rs2389763	7	17307847	16807847	17807847	3081	0.226926	0.0705117	0.497212	0.154446	0.0509048
ieu-b-90	5.64296	0.934115	1.5e-09	64949	C	T	3.59216	Standard tea intake || id:ukb-b-3294	ukb-b-3291	rs2389763	7	17307847	16807847	17807847	3081	0.603783	0.187611	0.147822	0.0459171	0.0148676
ieu-b-93	5.64296	0.934115	1.5e-09	64949	C	T	4.59216	Standard tea intake || id:ukb-b-3295	ukb-b-3291	rs2389763	7	17307847	16807847	17807847	3081	0.558957	0.173682	0.189425	0.0588399	0.0190964
ieu-b-97	5.64296	0.934115	1.5e-09	64949	C	T	5.59216	Standard tea intake || id:ukb-b-3296	ukb-b-3291	rs2389763	7	17307847	16807847	17807847	3081	0.591025	0.183647	0.159677	0.0495995	0.0160524
finn-b-C3_LIP_ORAL_PHARYNX	5.64296	0.934115	1.5e-09	64949	C	T	6.59216	Standard tea intake || id:ukb-b-3297	ukb-b-3291	rs2389763	7	17307847	16807847	17807847	3572	0.519572	0.187055	0.200813	0.0722761	0.0202833
finn-b-C3_LIP_ORAL_PHARYNX_EXALLC	5.64296	0.934115	1.5e-09	64949	C	T	7.59216	Standard tea intake || id:ukb-b-3298	ukb-b-3291	rs2389763	7	17307847	16807847	17807847	3572	0.519567	0.187053	0.200821	0.072279	0.0202796
finn-b-C3_LARYNX	5.64296	0.934115	1.5e-09	64949	C	T	8.59216	Standard tea intake || id:ukb-b-3299	ukb-b-3291	rs2389763	7	17307847	16807847	17807847	3572	0.519753	0.18712	0.200576	0.0721906	0.0203598
finn-b-C3_LARYNX_EXALLC	5.64296	0.934115	1.5e-09	64949	C	T	9.59216	Standard tea intake || id:ukb-b-3300	ukb-b-3291	rs2389763	7	17307847	16807847	17807847	3572	0.517628	0.186356	0.202544	0.072899	0.0205729
ieu-b-89	10.2075	1.04443	1.50003e-22	64949	T	C	0.25771	Standard tea intake || id:ukb-b-3291	ukb-b-3291	rs2472297	15	75027880	74527880	75527880	1719	0.74456	0.135328	0.0934482	0.0169751	0.00968846
ieu-b-94	10.2075	1.04443	1.50003e-22	64949	T	C	1.25771	Standard tea intake || id:ukb-b-3292	ukb-b-3291	rs2472297	15	75027880	74527880	75527880	1719	0.721355	0.131111	0.114733	0.0208414	0.0119605
ieu-b-96	10.2075	1.04443	1.50003e-22	64949	T	C	2.25771	Standard tea intake || id:ukb-b-3293	ukb-b-3291	rs2472297	15	75027880	74527880	75527880	1719	0.723535	0.131507	0.112756	0.0204823	0.0117203
ieu-b-90	10.2075	1.04443	1.50003e-22	64949	T	C	3.25771	Standard tea intake || id:ukb-b-3294	ukb-b-3291	rs2472297	15	75027880	74527880	75527880	1719	0.751479	0.136586	0.0871137	0.0158244	0.0089966
ieu-b-93	10.2075	1.04443	1.50003e-22	64949	T	C	4.25771	Standard tea intake || id:ukb-b-3295	ukb-b-3291	rs2472297	15	75027880	74527880	75527880	1719	0.750526	0.136413	0.0879269	0.0159721	0.00916204
ieu-b-97	10.2075	1.04443	1.50003e-22	64949	T	C	5.25771	Standard tea intake || id:ukb-b-3296	ukb-b-3291	rs2472297	15	75027880	74527880	75527880	1719	0.751749	0.136635	0.0868543	0.0157773	0.008984
finn-b-C3_LIP_ORAL_PHARYNX	10.2075	1.04443	1.50003e-22	64949	T	C	6.25771	Standard tea intake || id:ukb-b-3297	ukb-b-3291	rs2472297	15	75027880	74527880	75527880	1320	0.779521	0.107911	0.0905904	0.0125312	0.00944647
finn-b-C3_LIP_ORAL_PHARYNX_EXALLC	10.2075	1.04443	1.50003e-22	64949	T	C	7.25771	Standard tea intake || id:ukb-b-3298	ukb-b-3291	rs2472297	15	75027880	74527880	75527880	1320	0.779515	0.107911	0.0905922	0.0125315	0.00945099
finn-b-C3_LARYNX	10.2075	1.04443	1.50003e-22	64949	T	C	8.25771	Standard tea intake || id:ukb-b-3299	ukb-b-3291	rs2472297	15	75027880	74527880	75527880	1320	0.767239	0.106211	0.101783	0.0140795	0.0106866
finn-b-C3_LARYNX_EXALLC	10.2075	1.04443	1.50003e-22	64949	T	C	9.25771	Standard tea intake || id:ukb-b-3300	ukb-b-3291	rs2472297	15	75027880	74527880	75527880	1320	0.768502	0.106386	0.100627	0.0139195	0.0105654
ieu-b-89	0.035504	0.00621064	1.09999e-08	64949	C	T	0.758062	Added milk to standard tea || id:ukb-b-5209	ukb-b-5209	rs3791436	2	240042369	239542369	240542369	3154	0.0170036	0.77458	0.0040506	0.184501	0.0198647
ieu-b-94	0.035504	0.00621064	1.09999e-08	64949	C	T	1.75806	Added milk to standard tea || id:ukb-b-5210	ukb-b-5209	rs3791436	2	240042369	239542369	240542369	3154	0.0160353	0.730468	0.00455082	0.207266	0.0416802
ieu-b-96	0.035504	0.00621064	1.09999e-08	64949	C	T	2.75806	Added milk to standard tea || id:ukb-b-5211	ukb-b-5209	rs3791436	2	240042369	239542369	240542369	3154	0.0163979	0.74699	0.0038846	0.176903	0.0558251
ieu-b-90	0.035504	0.00621064	1.09999e-08	64949	C	T	3.75806	Added milk to standard tea || id:ukb-b-5212	ukb-b-5209	rs3791436	2	240042369	239542369	240542369	3154	0.0169961	0.774238	0.00390926	0.178055	0.0268013
ieu-b-93	0.035504	0.00621064	1.09999e-08	64949	C	T	4.75806	Added milk to standard tea || id:ukb-b-5213	ukb-b-5209	rs3791436	2	240042369	239542369	240542369	3154	0.0162585	0.740638	0.00446803	0.203501	0.0351345
ieu-b-97	0.035504	0.00621064	1.09999e-08	64949	C	T	5.75806	Added milk to standard tea || id:ukb-b-5214	ukb-b-5209	rs3791436	2	240042369	239542369	240542369	3154	0.0159427	0.726251	0.00476099	0.216845	0.0362004
finn-b-C3_LIP_ORAL_PHARYNX	0.035504	0.00621064	1.09999e-08	64949	C	T	6.75806	Added milk to standard tea || id:ukb-b-5215	ukb-b-5209	rs3791436	2	240042369	239542369	240542369	354	0.961845	0.00687858	0.0303906	0.000216668	0.000668723
finn-b-C3_LIP_ORAL_PHARYNX_EXALLC	0.035504	0.00621064	1.09999e-08	64949	C	T	7.75806	Added milk to standard tea || id:ukb-b-5216	ukb-b-5209	rs3791436	2	240042369	239542369	240542369	354	0.961744	0.00687785	0.0304909	0.000217384	0.000670061
finn-b-C3_LARYNX	0.035504	0.00621064	1.09999e-08	64949	C	T	8.75806	Added milk to standard tea || id:ukb-b-5217	ukb-b-5209	rs3791436	2	240042369	239542369	240542369	354	0.955534	0.00683344	0.0365987	0.00026096	0.000773182
finn-b-C3_LARYNX_EXALLC	0.035504	0.00621064	1.09999e-08	64949	C	T	9.75806	Added milk to standard tea || id:ukb-b-5218	ukb-b-5209	rs3791436	2	240042369	239542369	240542369	354	0.956419	0.00683977	0.0357137	0.000254631	0.000773229
ieu-b-89	0.0169583	0.00326378	2e-07	64949	T	C	0.159763	|| id:ukb-b-8553	ukb-b-8553	rs112262589	1	241301396	240801396	241801396	2764	0.131356	0.626527	0.0381264	0.181829	0.0221612
ieu-b-94	0.0169583	0.00326378	2e-07	64949	T	C	1.15976	|| id:ukb-b-8554	ukb-b-8553	rs112262589	1	241301396	240801396	241801396	2764	0.138097	0.658681	0.0308251	0.147	0.0253964
ieu-b-96	0.0169583	0.00326378	2e-07	64949	T	C	2.15976	|| id:ukb-b-8555	ukb-b-8553	rs112262589	1	241301396	240801396	241801396	2764	0.128714	0.613923	0.0401462	0.191459	0.0257584
ieu-b-90	0.0169583	0.00326378	2e-07	64949	T	C	3.15976	|| id:ukb-b-8556	ukb-b-8553	rs112262589	1	241301396	240801396	241801396	2765	0.144671	0.690041	0.024884	0.118668	0.0217364
ieu-b-93	0.0169583	0.00326378	2e-07	64949	T	C	4.15976	|| id:ukb-b-8557	ukb-b-8553	rs112262589	1	241301396	240801396	241801396	2765	0.141884	0.676751	0.0269869	0.128695	0.0256832
ieu-b-97	0.0169583	0.00326378	2e-07	64949	T	C	5.15976	|| id:ukb-b-8558	ukb-b-8553	rs112262589	1	241301396	240801396	241801396	2765	0.136895	0.652953	0.0320635	0.152909	0.0251795
finn-b-C3_LIP_ORAL_PHARYNX	0.0169583	0.00326378	2e-07	64949	T	C	6.15976	|| id:ukb-b-8559	ukb-b-8553	rs112262589	1	241301396	240801396	241801396	2836	0.159301	0.598203	0.0413812	0.155348	0.0457663
finn-b-C3_LIP_ORAL_PHARYNX_EXALLC	0.0169583	0.00326378	2e-07	64949	T	C	7.15976	|| id:ukb-b-8560	ukb-b-8553	rs112262589	1	241301396	240801396	241801396	2836	0.159151	0.597641	0.041524	0.155884	0.0457998
finn-b-C3_LARYNX	0.0169583	0.00326378	2e-07	64949	T	C	8.15976	|| id:ukb-b-8561	ukb-b-8553	rs112262589	1	241301396	240801396	241801396	2836	0.158557	0.595408	0.0434171	0.162999	0.0396189
finn-b-C3_LARYNX_EXALLC	0.0169583	0.00326378	2e-07	64949	T	C	9.15976	|| id:ukb-b-8562	ukb-b-8553	rs112262589	1	241301396	240801396	241801396	2836	0.158476	0.595106	0.043526	0.163408	0.0394836
ieu-b-89	0.0316298	0.00570836	2.99999e-08	64949	T	C	0.019261	Added milk to rooibos tea || id:ukb-b-11491	ukb-b-11491	rs146237263	10	93045663	92545663	93545663	2243	0.0586943	0.768709	0.00872497	0.11422	0.0496517
ieu-b-94	0.0316298	0.00570836	2.99999e-08	64949	T	C	1.01926	Added milk to rooibos tea || id:ukb-b-11492	ukb-b-11491	rs146237263	10	93045663	92545663	93545663	2243	0.0557374	0.729984	0.0114344	0.149701	0.0531434
ieu-b-96	0.0316298	0.00570836	2.99999e-08	64949	T	C	2.01926	Added milk to rooibos tea || id:ukb-b-11493	ukb-b-11491	rs146237263	10	93045663	92545663	93545663	2243	0.0571339	0.748274	0.00975295	0.127676	0.0571639
ieu-b-90	0.0316298	0.00570836	2.99999e-08	64949	T	C	3.01926	Added milk to rooibos tea || id:ukb-b-11494	ukb-b-11491	rs146237263	10	93045663	92545663	93545663	2246	0.0571653	0.748685	0.0102187	0.133783	0.0501484
ieu-b-93	0.0316298	0.00570836	2.99999e-08	64949	T	C	4.01926	Added milk to rooibos tea || id:ukb-b-11495	ukb-b-11491	rs146237263	10	93045663	92545663	93545663	2246	0.0564746	0.739639	0.00910795	0.11921	0.0755683
ieu-b-97	0.0316298	0.00570836	2.99999e-08	64949	T	C	5.01926	Added milk to rooibos tea || id:ukb-b-11496	ukb-b-11491	rs146237263	10	93045663	92545663	93545663	2246	0.0550743	0.721299	0.0108313	0.141785	0.0710105
finn-b-C3_LIP_ORAL_PHARYNX	0.0316298	0.00570836	2.99999e-08	64949	T	C	6.01926	Added milk to rooibos tea || id:ukb-b-11497	ukb-b-11491	rs146237263	10	93045663	92045663	94045663	334	0.963927	0.00355408	0.0320421	0.000117784	0.00035853
finn-b-C3_LIP_ORAL_PHARYNX_EXALLC	0.0316298	0.00570836	2.99999e-08	64949	T	C	7.01926	Added milk to rooibos tea || id:ukb-b-11498	ukb-b-11491	rs146237263	10	93045663	92045663	94045663	334	0.963463	0.00355237	0.0325075	0.0001195	0.000357741
finn-b-C3_LARYNX	0.0316298	0.00570836	2.99999e-08	64949	T	C	8.01926	Added milk to rooibos tea || id:ukb-b-11499	ukb-b-11491	rs146237263	10	93045663	92045663	94045663	334	0.971163	0.00358076	0.0248356	9.12417e-05	0.000329413
finn-b-C3_LARYNX_EXALLC	0.0316298	0.00570836	2.99999e-08	64949	T	C	9.01926	Added milk to rooibos tea || id:ukb-b-11500	ukb-b-11491	rs146237263	10	93045663	92045663	94045663	334	0.971223	0.00358098	0.0247764	9.10237e-05	0.00032878
ieu-b-89	0.0141242	0.00254446	2.80001e-08	64949	A	G	0.67683	Tea consumed || id:ukb-b-17988	ukb-b-17988	rs7276934	21	37872250	37372250	38372250	29400	0.429867	0.0843976	0.391172	0.0767985	0.0177649
ieu-b-94	0.0141242	0.00254446	2.80001e-08	64949	A	G	1.67683	Tea consumed || id:ukb-b-17989	ukb-b-17988	rs7276934	21	37872250	37372250	38372250	29402	0.450552	0.088452	0.368272	0.0722966	0.0204278
ieu-b-96	0.0141242	0.00254446	2.80001e-08	64949	A	G	2.67683	Tea consumed || id:ukb-b-17990	ukb-b-17988	rs7276934	21	37872250	37372250	38372250	29400	0.453793	0.0890952	0.365889	0.0718344	0.0193881
ieu-b-90	0.0141242	0.00254446	2.80001e-08	64949	A	G	3.67683	Tea consumed || id:ukb-b-17991	ukb-b-17988	rs7276934	21	37872250	37372250	38372250	29408	0.442175	0.0867911	0.379078	0.0744041	0.017552
ieu-b-93	0.0141242	0.00254446	2.80001e-08	64949	A	G	4.67683	Tea consumed || id:ukb-b-17992	ukb-b-17988	rs7276934	21	37872250	37372250	38372250	29407	0.383052	0.0751885	0.438428	0.0860561	0.0172759
ieu-b-97	0.0141242	0.00254446	2.80001e-08	64949	A	G	5.67683	Tea consumed || id:ukb-b-17993	ukb-b-17988	rs7276934	21	37872250	37372250	38372250	29408	0.45858	0.0900111	0.360214	0.0707011	0.0204938
finn-b-C3_LIP_ORAL_PHARYNX	0.0141242	0.00254446	2.80001e-08	64949	A	G	6.67683	Tea consumed || id:ukb-b-17994	ukb-b-17988	rs7276934	21	37872250	37372250	38372250	28776	0.416118	0.0839766	0.398311	0.0803806	0.021214
finn-b-C3_LIP_ORAL_PHARYNX_EXALLC	0.0141242	0.00254446	2.80001e-08	64949	A	G	7.67683	Tea consumed || id:ukb-b-17995	ukb-b-17988	rs7276934	21	37872250	37372250	38372250	28776	0.415814	0.0839153	0.398602	0.0804392	0.0212301
finn-b-C3_LARYNX	0.0141242	0.00254446	2.80001e-08	64949	A	G	8.67683	Tea consumed || id:ukb-b-17996	ukb-b-17988	rs7276934	21	37872250	37372250	38372250	28776	0.419722	0.0847041	0.393795	0.0794691	0.0223093
finn-b-C3_LARYNX_EXALLC	0.0141242	0.00254446	2.80001e-08	64949	A	G	9.67683	Tea consumed || id:ukb-b-17997	ukb-b-17988	rs7276934	21	37872250	37372250	38372250	28776	0.419851	0.08473	0.393521	0.0794137	0.0224844
Table S2.Results of colocalization analysis.For colocalisation analyses, we extracted SNPs that fell within a 500 kb or 1000kb window upstream and downstream of the SNP used as an instrument for the exposure and outcome datasets.we acquired GWAS summary data from the MRC IEU OpenGWAS data resource. We queried their chromosomal number and position within the PheWAS - IEU OpenGWAS project (mrcieu.a…
