# Supplementary material for: Causal association between tea consumption and head and neck cancer: a Mendelian randomization study
Source: Royal Society of Chemistry journal article supplement (doi:10.1039/d3fo04017h), 2024-01-01
Supplement: d3fo04017h4.xlsx [file d3fo04017h4.xlsx]

## Sheet: Sheet1
			MVMR_IVW			MVMR_MR_Egger			MVMR_lasso			Heterogeneity		Pleiotropy
GWAS id of outcome	Outcome	Exposure	Beta	SE	Pval	Beta	SE	Pval	Beta	SE	Pval	Statistic	Pval	Statistic	Pval
ieu-b-89	Oral cavity and pharyngeal cancer || id:ieu-b-89	Green tea intake || id:ukb-b-4078	-0.00443479	0.0176304	0.801395	-0.018302	0.0202606	0.366351	-0.00303084	0.0160219	0.84996	152.573	0.0415674	152.171	0.0381902
ieu-b-89	Oral cavity and pharyngeal cancer || id:ieu-b-89	Alcoholic drinks per week || id:ieu-b-73	0.932134	0.603887	0.122696	0.893441	0.602396	0.138035	1.04155	0.550973	0.0587055
ieu-b-89	Oral cavity and pharyngeal cancer || id:ieu-b-89	smoking initiation || id:ieu-b-4877	0.315622	0.230076	0.170122	0.309346	0.229303	0.177314	0.260598	0.21444	0.22427
ieu-b-94	Oral cavity cancer || id:ieu-b-94	Green tea intake || id:ukb-b-4078	-0.0181278	0.0206702	0.380486	-0.0375758	0.0237141	0.113073	-0.0158494	0.0196593	0.420124	137.209	0.196913	136.557	0.190342
ieu-b-94	Oral cavity cancer || id:ieu-b-94	Alcoholic drinks per week || id:ieu-b-73	0.950039	0.703831	0.177076	0.898741	0.699795	0.19904	0.693514	0.679162	0.307192
ieu-b-94	Oral cavity cancer || id:ieu-b-94	smoking initiation || id:ieu-b-4877	0.596034	0.268304	0.0263178	0.588712	0.266536	0.0271917	0.56464	0.256712	0.0278416
ieu-b-96	Oropharyngeal cancer || id:ieu-b-96	Green tea intake || id:ukb-b-4078	0.0105505	0.0248126	0.670685	0.00592745	0.0287352	0.836573	0.0291863	0.0276081	0.290438	169.687	0.00405779	169.481	0.00349855
ieu-b-96	Oropharyngeal cancer || id:ieu-b-96	Alcoholic drinks per week || id:ieu-b-73	0.75055	0.849349	0.37687	0.736632	0.853526	0.388112	0.879686	0.749367	0.240433
ieu-b-96	Oropharyngeal cancer || id:ieu-b-96	smoking initiation || id:ieu-b-4877	-0.106155	0.323729	0.742977	-0.108177	0.324966	0.739219	-0.374915	0.295617	0.204709
ieu-b-90	Oral cavity and pharyngeal cancer || id:ieu-b-90	Green tea intake || id:ukb-b-4078	-0.00946514	0.0185499	0.609874	0.00413029	0.0213459	0.846573	-0.00295195	0.017219	0.863881	153.375	0.0431022	152.502	0.0419194
ieu-b-90	Oral cavity and pharyngeal cancer || id:ieu-b-90	Alcoholic drinks per week || id:ieu-b-73	1.5114	0.626184	0.0157926	1.55238	0.625431	0.0130612	1.46623	0.602879	0.0150136
ieu-b-90	Oral cavity and pharyngeal cancer || id:ieu-b-90	smoking initiation || id:ieu-b-4877	0.320106	0.239596	0.181541	0.326532	0.239045	0.171944	0.275677	0.224872	0.220226
ieu-b-93	Oral cavity cancer || id:ieu-b-93	Green tea intake || id:ukb-b-4078	-0.0464985	0.0227313	0.040799	-0.0260919	0.0261618	0.318605	-0.0505356	0.0212276	0.0172819	149.925	0.063772	147.644	0.0725515
ieu-b-93	Oral cavity cancer || id:ieu-b-93	Alcoholic drinks per week || id:ieu-b-73	1.88016	0.755516	0.0128257	1.94207	0.75238	0.00984473	1.55989	0.74551	0.036404
ieu-b-93	Oral cavity cancer || id:ieu-b-93	smoking initiation || id:ieu-b-4877	-0.124104	0.289258	0.667893	-0.113624	0.28773	0.692919	-0.25916	0.273292	0.342982
ieu-b-97	Oropharyngeal cancer || id:ieu-b-97	Green tea intake || id:ukb-b-4078	0.0222059	0.0210287	0.290978	0.0272345	0.024285	0.262095	0.0222059	0.0210287	0.290978	124.888	0.48601	124.046	0.481949
ieu-b-97	Oropharyngeal cancer || id:ieu-b-97	Alcoholic drinks per week || id:ieu-b-73	1.08095	0.716987	0.131649	1.09686	0.720052	0.127681	1.08095	0.716987	0.131649
ieu-b-97	Oropharyngeal cancer || id:ieu-b-97	smoking initiation || id:ieu-b-4877	0.87564	0.273202	0.00135014	0.878324	0.274061	0.00135132	0.87564	0.273202	0.00135014
finn-b-C3_LIP_ORAL_PHARYNX	Malignant neoplasm of lip, oral cavity and pharynx || id:finn-b-C3_LIP_ORAL_PHARYNX	Green tea intake || id:ukb-b-4078	-0.0402919	0.0343575	0.240906	-0.0351369	0.0374076	0.347577	-0.0402919	0.0343575	0.240906	113.467	0.94476	113.18	0.939854
finn-b-C3_LIP_ORAL_PHARYNX	Malignant neoplasm of lip, oral cavity and pharynx || id:finn-b-C3_LIP_ORAL_PHARYNX	Alcoholic drinks per week || id:ieu-b-73	-0.297967	0.769682	0.69866	-0.305859	0.770016	0.691211	-0.297967	0.769682	0.69866
finn-b-C3_LIP_ORAL_PHARYNX	Malignant neoplasm of lip, oral cavity and pharynx || id:finn-b-C3_LIP_ORAL_PHARYNX	smoking initiation || id:ieu-b-4877	0.632461	0.557713	0.256784	0.597401	0.566718	0.291819	0.632461	0.557713	0.256784
finn-b-C3_LIP_ORAL_PHARYNX_EXALLC	"Malignant neoplasm of lip, oral cavity and pharynx" (all cancers excluded) || id:finn-b-C3_LIP_ORAL_PHARYNX_EXALLC	Green tea intake || id:ukb-b-4078	-0.0403487	0.0344171	0.241058	-0.035499	0.0374782	0.343542	-0.0403487	0.0344171	0.241058	114.331	0.937831	114.044	0.932449
finn-b-C3_LIP_ORAL_PHARYNX_EXALLC	"Malignant neoplasm of lip, oral cavity and pharynx" (all cancers excluded) || id:finn-b-C3_LIP_ORAL_PHARYNX_EXALLC	Alcoholic drinks per week || id:ieu-b-73	-0.307523	0.770963	0.68998	-0.314952	0.771297	0.683024	-0.307523	0.770963	0.68998
finn-b-C3_LIP_ORAL_PHARYNX_EXALLC	"Malignant neoplasm of lip, oral cavity and pharynx" (all cancers excluded) || id:finn-b-C3_LIP_ORAL_PHARYNX_EXALLC	smoking initiation || id:ieu-b-4877	0.621708	0.55838	0.26553	0.588748	0.56741	0.299453	0.621708	0.55838	0.26553
finn-b-C3_LARYNX	Malignant neoplasm of larynx || id:finn-b-C3_LARYNX	Green tea intake || id:ukb-b-4078	0.025678	0.0315396	0.415559	0.0363368	0.0343791	0.290537	0.0137851	0.0290648	0.635294	164.659	0.0677598	164.403	0.0620885
finn-b-C3_LARYNX	Malignant neoplasm of larynx || id:finn-b-C3_LARYNX	Alcoholic drinks per week || id:ieu-b-73	0.909611	0.708358	0.199103	0.892907	0.709658	0.208312	0.441719	0.667653	0.508228
finn-b-C3_LARYNX	Malignant neoplasm of larynx || id:finn-b-C3_LARYNX	smoking initiation || id:ieu-b-4877	0.224452	0.513387	0.661967	0.151658	0.522397	0.771578	0.543224	0.480739	0.258485
finn-b-C3_LARYNX_EXALLC	Malignant neoplasm of larynx (all cancers excluded) || id:finn-b-C3_LARYNX_EXALLC	Green tea intake || id:ukb-b-4078	0.0250822	0.0315494	0.426605	0.0354082	0.0344006	0.303343	0.0132446	0.0291209	0.649244	164.127	0.0715772	163.887	0.0655487
finn-b-C3_LARYNX_EXALLC	Malignant neoplasm of larynx (all cancers excluded) || id:finn-b-C3_LARYNX_EXALLC	Alcoholic drinks per week || id:ieu-b-73	0.893926	0.708622	0.207129	0.877794	0.710023	0.216351	0.432583	0.668961	0.517859
finn-b-C3_LARYNX_EXALLC	Malignant neoplasm of larynx (all cancers excluded) || id:finn-b-C3_LARYNX_EXALLC	smoking initiation || id:ieu-b-4877	0.207888	0.513196	0.685415	0.137307	0.52232	0.792643	0.527027	0.48132	0.273534
ieu-b-89	Oral cavity and pharyngeal cancer || id:ieu-b-89	Tea intake || id:ukb-b-6066	0.63805	0.419026	0.127835	0.439468	0.574281	0.444124	0.520821	0.39124	0.183121	177.432	0.0859363	176.843	0.0820201
ieu-b-89	Oral cavity and pharyngeal cancer || id:ieu-b-89	Alcoholic drinks per week || id:ieu-b-73	0.965022	0.55785	0.0836489	1.01486	0.56778	0.07387	1.06708	0.524082	0.041741
ieu-b-89	Oral cavity and pharyngeal cancer || id:ieu-b-89	smoking initiation || id:ieu-b-4877	0.216198	0.219224	0.324038	0.191213	0.225214	0.395867	0.162397	0.210181	0.439729
ieu-b-94	Oral cavity cancer || id:ieu-b-94	Tea intake || id:ukb-b-6066	0.39106	0.496723	0.431119	-0.0076649	0.678999	0.990993	0.302755	0.477937	0.526432	165.565	0.230436	165.175	0.219809
ieu-b-94	Oral cavity cancer || id:ieu-b-94	Alcoholic drinks per week || id:ieu-b-73	0.689256	0.661777	0.297633	0.791165	0.672798	0.239622	0.460441	0.645049	0.475346
ieu-b-94	Oral cavity cancer || id:ieu-b-94	smoking initiation || id:ieu-b-4877	0.548306	0.260292	0.0351605	0.497493	0.267095	0.0625173	0.517066	0.251717	0.0399607
ieu-b-96	Oropharyngeal cancer || id:ieu-b-96	Tea intake || id:ukb-b-6066	1.11622	0.579984	0.0542828	0.786613	0.793716	0.32166	1.2909	0.522911	0.0135609	192.961	0.015834	192.334	0.0148909
ieu-b-96	Oropharyngeal cancer || id:ieu-b-96	Alcoholic drinks per week || id:ieu-b-73	1.03701	0.77621	0.181554	1.12107	0.789934	0.155841	0.966734	0.693999	0.163623
ieu-b-96	Oropharyngeal cancer || id:ieu-b-96	smoking initiation || id:ieu-b-4877	-0.246292	0.305006	0.419379	-0.287884	0.313153	0.357935	-0.429017	0.279772	0.125165
ieu-b-90	Oral cavity and pharyngeal cancer || id:ieu-b-90	Tea intake || id:ukb-b-6066	0.270108	0.440313	0.539582	0.258753	0.601914	0.66728	0.355908	0.407368	0.382293	181.296	0.065601	180.306	0.0649762
ieu-b-90	Oral cavity and pharyngeal cancer || id:ieu-b-90	Alcoholic drinks per week || id:ieu-b-73	1.55255	0.583366	0.0077825	1.5555	0.594804	0.00891909	1.40429	0.562366	0.0125209
ieu-b-90	Oral cavity and pharyngeal cancer || id:ieu-b-90	smoking initiation || id:ieu-b-4877	0.320845	0.230288	0.16355	0.319459	0.236371	0.176531	0.245242	0.219438	0.263742
ieu-b-93	Oral cavity cancer || id:ieu-b-93	Tea intake || id:ukb-b-6066	0.540477	0.548726	0.324641	0.385547	0.749814	0.607119	0.605054	0.504047	0.229987	189.612	0.0269097	188.909	0.0256736
ieu-b-93	Oral cavity cancer || id:ieu-b-93	Alcoholic drinks per week || id:ieu-b-73	1.5676	0.728005	0.0312971	1.60802	0.742151	0.0302577	0.900362	0.691938	0.193184
ieu-b-93	Oral cavity cancer || id:ieu-b-93	smoking initiation || id:ieu-b-4877	-0.125783	0.287567	0.661819	-0.144997	0.295252	0.623359	-0.204006	0.266436	0.443864
ieu-b-97	Oropharyngeal cancer || id:ieu-b-97	Tea intake || id:ukb-b-6066	-0.0403429	0.510781	0.937046	0.0145443	0.695384	0.983313	-0.0403429	0.510781	0.937046	150.824	0.557313	149.981	0.553902
ieu-b-97	Oropharyngeal cancer || id:ieu-b-97	Alcoholic drinks per week || id:ieu-b-73	1.4358	0.681666	0.0351775	1.42131	0.692955	0.0402586	1.4358	0.681666	0.0351775
ieu-b-97	Oropharyngeal cancer || id:ieu-b-97	smoking initiation || id:ieu-b-4877	0.879945	0.268052	0.00102802	0.886693	0.274258	0.00122472	0.879945	0.268052	0.00102802
finn-b-C3_LIP_ORAL_PHARYNX	Malignant neoplasm of lip, oral cavity and pharynx || id:finn-b-C3_LIP_ORAL_PHARYNX	Tea intake || id:ukb-b-6066	0.629604	1.11543	0.572449	0.48175	1.5014	0.748311	0.629604	1.11543	0.572449	135.042	0.916168	135.016	0.907176
finn-b-C3_LIP_ORAL_PHARYNX	Malignant neoplasm of lip, oral cavity and pharynx || id:finn-b-C3_LIP_ORAL_PHARYNX	Alcoholic drinks per week || id:ieu-b-73	0.554357	1.27308	0.663238	0.55057	1.27334	0.665463	0.554357	1.27308	0.663238
finn-b-C3_LIP_ORAL_PHARYNX	Malignant neoplasm of lip, oral cavity and pharynx || id:finn-b-C3_LIP_ORAL_PHARYNX	smoking initiation || id:ieu-b-4877	0.0367982	0.577592	0.949201	0.024897	0.583229	0.96595	0.0367982	0.577592	0.949201
finn-b-C3_LIP_ORAL_PHARYNX_EXALLC	"Malignant neoplasm of lip, oral cavity and pharynx" (all cancers excluded) || id:finn-b-C3_LIP_ORAL_PHARYNX_EXALLC	Tea intake || id:ukb-b-6066	0.630038	1.11658	0.57258	0.417008	1.50293	0.781425	0.630038	1.11658	0.57258	135.412	0.912544	135.385	0.903291
finn-b-C3_LIP_ORAL_PHARYNX_EXALLC	"Malignant neoplasm of lip, oral cavity and pharynx" (all cancers excluded) || id:finn-b-C3_LIP_ORAL_PHARYNX_EXALLC	Alcoholic drinks per week || id:ieu-b-73	0.589544	1.27437	0.643639	0.584063	1.27463	0.646794	0.589544	1.27437	0.643639
finn-b-C3_LIP_ORAL_PHARYNX_EXALLC	"Malignant neoplasm of lip, oral cavity and pharynx" (all cancers excluded) || id:finn-b-C3_LIP_ORAL_PHARYNX_EXALLC	smoking initiation || id:ieu-b-4877	0.0531432	0.578308	0.926782	0.0359968	0.583949	0.950847	0.0531432	0.578308	0.926782
finn-b-C3_LARYNX	Malignant neoplasm of larynx || id:finn-b-C3_LARYNX	Tea intake || id:ukb-b-6066	-1.0143	1.04397	0.331259	-2.75281	1.39434	0.0483516	-1.74635	0.95985	0.0688508	194.708	0.0283067	194.547	0.0254261
finn-b-C3_LARYNX	Malignant neoplasm of larynx || id:finn-b-C3_LARYNX	Alcoholic drinks per week || id:ieu-b-73	0.299015	1.1931	0.802108	0.254637	1.18418	0.829742	-0.666508	1.0933	0.542106
finn-b-C3_LARYNX	Malignant neoplasm of larynx || id:finn-b-C3_LARYNX	smoking initiation || id:ieu-b-4877	-0.569801	0.540703	0.291967	-0.70936	0.541756	0.190409	0.278322	0.508446	0.584106
finn-b-C3_LARYNX_EXALLC	Malignant neoplasm of larynx (all cancers excluded) || id:finn-b-C3_LARYNX_EXALLC	Tea intake || id:ukb-b-6066	-1.01137	1.04707	0.33409	-2.81657	1.3973	0.0438286	-1.4756	0.955626	0.122559	195.346	0.0263425	195.192	0.0236121
finn-b-C3_LARYNX_EXALLC	Malignant neoplasm of larynx (all cancers excluded) || id:finn-b-C3_LARYNX_EXALLC	Alcoholic drinks per week || id:ieu-b-73	0.324216	1.1966	0.786431	0.278074	1.18671	0.814734	-0.505592	1.09349	0.64382
finn-b-C3_LARYNX_EXALLC	Malignant neoplasm of larynx (all cancers excluded) || id:finn-b-C3_LARYNX_EXALLC	smoking initiation || id:ieu-b-4877	-0.539073	0.542365	0.320256	-0.684173	0.543002	0.207676	0.175395	0.506733	0.729246
ieu-b-89	Oral cavity and pharyngeal cancer || id:ieu-b-89	Herbal tea intake || id:ukb-b-13344	-0.00433568	0.0101673	0.669793	-0.00388023	0.0109443	0.722932	-0.00480386	0.00927026	0.604318	149.702	0.0510607	149.313	0.0469868
ieu-b-89	Oral cavity and pharyngeal cancer || id:ieu-b-89	Alcoholic drinks per week || id:ieu-b-73	0.89552	0.597504	0.133933	0.887026	0.60441	0.142215	1.01392	0.548306	0.0644312
ieu-b-89	Oral cavity and pharyngeal cancer || id:ieu-b-89	smoking initiation || id:ieu-b-4877	0.320953	0.230546	0.163878	0.322654	0.231945	0.1642	0.267395	0.21628	0.216335
ieu-b-94	Oral cavity cancer || id:ieu-b-94	Herbal tea intake || id:ukb-b-13344	-0.00458735	0.0120489	0.703405	-0.00627239	0.0129716	0.628708	-0.00394563	0.011441	0.730193	136.571	0.190117	136.161	0.179839
ieu-b-94	Oral cavity cancer || id:ieu-b-94	Alcoholic drinks per week || id:ieu-b-73	0.901542	0.70117	0.198524	0.932336	0.70888	0.188435	0.657997	0.675499	0.330011
ieu-b-94	Oral cavity cancer || id:ieu-b-94	smoking initiation || id:ieu-b-4877	0.595238	0.270583	0.0278186	0.588676	0.272161	0.0305438	0.561191	0.258385	0.0298616
ieu-b-96	Oropharyngeal cancer || id:ieu-b-96	Herbal tea intake || id:ukb-b-13344	-0.00514874	0.0143214	0.719211	-0.00128963	0.0153925	0.933229	-0.00274181	0.0124694	0.825962	164.601	0.00728867	164.467	0.00627038
ieu-b-96	Oropharyngeal cancer || id:ieu-b-96	Alcoholic drinks per week || id:ieu-b-73	0.75633	0.83601	0.36563	0.682758	0.844468	0.418799	0.6653	0.742119	0.369993
ieu-b-96	Oropharyngeal cancer || id:ieu-b-96	smoking initiation || id:ieu-b-4877	-0.0912511	0.322433	0.777171	-0.0762379	0.32384	0.813884	-0.305163	0.296306	0.30306
ieu-b-90	Oral cavity and pharyngeal cancer || id:ieu-b-90	Herbal tea intake || id:ukb-b-13344	0.00809115	0.0108651	0.456457	0.00603027	0.0116899	0.605957	0.00829842	0.00976418	0.39539	154.48	0.0330366	153.624	0.0319941
ieu-b-90	Oral cavity and pharyngeal cancer || id:ieu-b-90	Alcoholic drinks per week || id:ieu-b-73	1.5162	0.627433	0.0156702	1.5546	0.634283	0.0142476	1.40803	0.590105	0.0170296
ieu-b-90	Oral cavity and pharyngeal cancer || id:ieu-b-90	smoking initiation || id:ieu-b-4877	0.307021	0.243248	0.206887	0.299927	0.244433	0.219811	0.181489	0.22464	0.419144
ieu-b-93	Oral cavity cancer || id:ieu-b-93	Herbal tea intake || id:ukb-b-13344	0.018194	0.0131853	0.167626	0.0164285	0.0141907	0.246989	0.0149995	0.0118776	0.206645	154.972	0.0310981	154.063	0.0303012
ieu-b-93	Oral cavity cancer || id:ieu-b-93	Alcoholic drinks per week || id:ieu-b-73	1.76488	0.766851	0.0213653	1.79778	0.775498	0.0204367	1.35085	0.735832	0.0663853
ieu-b-93	Oral cavity cancer || id:ieu-b-93	smoking initiation || id:ieu-b-4877	-0.157585	0.297542	0.596374	-0.163503	0.2991	0.584618	-0.374653	0.279247	0.179709
ieu-b-97	Oropharyngeal cancer || id:ieu-b-97	Herbal tea intake || id:ukb-b-13344	-0.00582091	0.0126628	0.645743	-0.00781861	0.0136293	0.566198	-0.0039513	0.0123386	0.748787	131.208	0.311624	130.554	0.303475
ieu-b-97	Oropharyngeal cancer || id:ieu-b-97	Alcoholic drinks per week || id:ieu-b-73	1.17483	0.733592	0.10927	1.21282	0.742028	0.10216	1.27781	0.723955	0.0775567
ieu-b-97	Oropharyngeal cancer || id:ieu-b-97	smoking initiation || id:ieu-b-4877	0.886316	0.283112	0.00174438	0.879304	0.284598	0.00200402	0.969968	0.278693	0.000500629
finn-b-C3_LIP_ORAL_PHARYNX	Malignant neoplasm of lip, oral cavity and pharynx || id:finn-b-C3_LIP_ORAL_PHARYNX	Herbal tea intake || id:ukb-b-13344	0.00891045	0.0278469	0.748983	0.000784827	0.0296569	0.978888	0.00891045	0.0278469	0.748983	119.5	0.87013	119.479	0.856915
finn-b-C3_LIP_ORAL_PHARYNX	Malignant neoplasm of lip, oral cavity and pharynx || id:finn-b-C3_LIP_ORAL_PHARYNX	Alcoholic drinks per week || id:ieu-b-73	-0.312081	0.768119	0.684528	-0.301936	0.768225	0.694297	-0.312081	0.768119	0.684528
finn-b-C3_LIP_ORAL_PHARYNX	Malignant neoplasm of lip, oral cavity and pharynx || id:finn-b-C3_LIP_ORAL_PHARYNX	smoking initiation || id:ieu-b-4877	-0.0130359	0.546783	0.980979	-0.0519441	0.548961	0.924615	-0.0130359	0.546783	0.980979
finn-b-C3_LIP_ORAL_PHARYNX_EXALLC	"Malignant neoplasm of lip, oral cavity and pharynx" (all cancers excluded) || id:finn-b-C3_LIP_ORAL_PHARYNX_EXALLC	Herbal tea intake || id:ukb-b-13344	0.00787358	0.0278441	0.77735	1.49317e-05	0.0296529	0.999598	0.00787358	0.0278441	0.77735	120.591	0.85428	120.572	0.840003
finn-b-C3_LIP_ORAL_PHARYNX_EXALLC	"Malignant neoplasm of lip, oral cavity and pharynx" (all cancers excluded) || id:finn-b-C3_LIP_ORAL_PHARYNX_EXALLC	Alcoholic drinks per week || id:ieu-b-73	-0.306232	0.769388	0.690615	-0.296361	0.769495	0.700135	-0.306232	0.769388	0.690615
finn-b-C3_LIP_ORAL_PHARYNX_EXALLC	"Malignant neoplasm of lip, oral cavity and pharynx" (all cancers excluded) || id:finn-b-C3_LIP_ORAL_PHARYNX_EXALLC	smoking initiation || id:ieu-b-4877	-0.03495	0.547419	0.949094	-0.0726408	0.549599	0.89485	-0.03495	0.547419	0.949094
finn-b-C3_LARYNX	Malignant neoplasm of larynx || id:finn-b-C3_LARYNX	Herbal tea intake || id:ukb-b-13344	-0.00648443	0.0261212	0.803946	-0.00808869	0.0279138	0.771989	-0.0240507	0.023861	0.313479	170.111	0.0328903	169.936	0.0294457
finn-b-C3_LARYNX	Malignant neoplasm of larynx || id:finn-b-C3_LARYNX	Alcoholic drinks per week || id:ieu-b-73	0.687968	0.721126	0.340074	0.689998	0.723781	0.340426	0.179956	0.66638	0.787121
finn-b-C3_LARYNX	Malignant neoplasm of larynx || id:finn-b-C3_LARYNX	smoking initiation || id:ieu-b-4877	-0.474907	0.513481	0.35503	-0.482626	0.517362	0.350893	-0.176667	0.471549	0.70792
finn-b-C3_LARYNX_EXALLC	Malignant neoplasm of larynx (all cancers excluded) || id:finn-b-C3_LARYNX_EXALLC	Herbal tea intake || id:ukb-b-13344	-0.00676047	0.0260524	0.795253	-0.00811181	0.0278421	0.770783	-0.0243456	0.0239025	0.308424	168.806	0.0382519	168.618	0.0343942
finn-b-C3_LARYNX_EXALLC	Malignant neoplasm of larynx (all cancers excluded) || id:finn-b-C3_LARYNX_EXALLC	Alcoholic drinks per week || id:ieu-b-73	0.691699	0.719763	0.336547	0.693407	0.722434	0.337145	0.190972	0.667674	0.774859
finn-b-C3_LARYNX_EXALLC	Malignant neoplasm of larynx (all cancers excluded) || id:finn-b-C3_LARYNX_EXALLC	smoking initiation || id:ieu-b-4877	-0.502439	0.512136	0.32656	-0.508928	0.516014	0.324002	-0.204244	0.472111	0.665292
ieu-b-89	Oral cavity and pharyngeal cancer || id:ieu-b-89	Standard tea intake || id:ukb-b-3291	0.00214312	0.00225509	0.341937	0.00173297	0.00323168	0.59179	0.00308876	0.00207468	0.136543	261.76	0.0112571	260.738	0.0111458
ieu-b-89	Oral cavity and pharyngeal cancer || id:ieu-b-89	Alcoholic drinks per week || id:ieu-b-73	0.466686	0.427244	0.274694	0.47958	0.434336	0.26952	0.474441	0.389217	0.222858
ieu-b-89	Oral cavity and pharyngeal cancer || id:ieu-b-89	smoking initiation || id:ieu-b-4877	0.413132	0.188955	0.0287863	0.41011	0.190152	0.0310251	0.372948	0.177562	0.0356949
ieu-b-94	Oral cavity cancer || id:ieu-b-94	Standard tea intake || id:ukb-b-3291	0.00158551	0.00259792	0.541664	0.00389444	0.00371481	0.294475	0.00200402	0.00249109	0.421122	231.139	0.174882	230.418	0.171077
ieu-b-94	Oral cavity cancer || id:ieu-b-94	Alcoholic drinks per week || id:ieu-b-73	0.406397	0.493074	0.409819	0.334141	0.500298	0.504207	0.320012	0.476365	0.501725
ieu-b-94	Oral cavity cancer || id:ieu-b-94	smoking initiation || id:ieu-b-4877	0.661609	0.21806	0.00241284	0.678363	0.219034	0.00195441	0.618393	0.209675	0.00318504
ieu-b-96	Oropharyngeal cancer || id:ieu-b-96	Standard tea intake || id:ukb-b-3291	0.00226625	0.00315178	0.472117	-8.19651e-05	0.00450339	0.985479	0.00344912	0.0027745	0.213812	289.923	0.000299983	289.479	0.000269877
ieu-b-96	Oropharyngeal cancer || id:ieu-b-96	Alcoholic drinks per week || id:ieu-b-73	0.354305	0.59909	0.554249	0.430312	0.6087	0.479607	0.282664	0.526273	0.591195
ieu-b-96	Oropharyngeal cancer || id:ieu-b-96	smoking initiation || id:ieu-b-4877	0.0814829	0.264817	0.758315	0.0640411	0.266181	0.809871	0.00805474	0.239558	0.973177
ieu-b-90	Oral cavity and pharyngeal cancer || id:ieu-b-90	Standard tea intake || id:ukb-b-3291	0.00173698	0.00233995	0.457897	0.00473684	0.00333668	0.155717	0.00172457	0.00213888	0.420073	262.646	0.0115395	261.657	0.0113866
ieu-b-90	Oral cavity and pharyngeal cancer || id:ieu-b-90	Alcoholic drinks per week || id:ieu-b-73	0.878162	0.444347	0.0481207	0.78327	0.450087	0.0818129	0.787841	0.413414	0.0566896
ieu-b-90	Oral cavity and pharyngeal cancer || id:ieu-b-90	smoking initiation || id:ieu-b-4877	0.372524	0.196453	0.0579266	0.39282	0.196844	0.0459785	0.271684	0.183204	0.138085
ieu-b-93	Oral cavity cancer || id:ieu-b-93	Standard tea intake || id:ukb-b-3291	0.00411059	0.00276282	0.136797	0.00825736	0.00393127	0.035691	0.00489028	0.00262807	0.0627749	244.827	0.0663919	242.93	0.0712302
ieu-b-93	Oral cavity cancer || id:ieu-b-93	Alcoholic drinks per week || id:ieu-b-73	1.4595	0.523815	0.00533139	1.32927	0.529735	0.0120968	1.39093	0.502386	0.00562902
ieu-b-93	Oral cavity cancer || id:ieu-b-93	smoking initiation || id:ieu-b-4877	0.0374157	0.23194	0.871845	0.0657365	0.232089	0.776994	0.0419672	0.22002	0.848727
ieu-b-97	Oropharyngeal cancer || id:ieu-b-97	Standard tea intake || id:ukb-b-3291	-0.00102072	0.00275301	0.710811	0.00180776	0.00392388	0.645008	-0.00124325	0.00270554	0.645862	228.833	0.217407	228.147	0.212649
ieu-b-97	Oropharyngeal cancer || id:ieu-b-97	Alcoholic drinks per week || id:ieu-b-73	0.289597	0.52472	0.581011	0.198779	0.532317	0.708834	0.296372	0.515478	0.565328
ieu-b-97	Oropharyngeal cancer || id:ieu-b-97	smoking initiation || id:ieu-b-4877	0.802303	0.231501	0.000528924	0.822019	0.232307	0.000402401	0.762649	0.227817	0.000815049
finn-b-C3_LIP_ORAL_PHARYNX	Malignant neoplasm of lip, oral cavity and pharynx || id:finn-b-C3_LIP_ORAL_PHARYNX	Standard tea intake || id:ukb-b-3291	-0.00706801	0.00583345	0.225652	-0.011652	0.00818163	0.154398	-0.00706801	0.00583345	0.225652	198.837	0.732506	198.268	0.72577
finn-b-C3_LIP_ORAL_PHARYNX	Malignant neoplasm of lip, oral cavity and pharynx || id:finn-b-C3_LIP_ORAL_PHARYNX	Alcoholic drinks per week || id:ieu-b-73	-0.875384	1.13046	0.438718	-0.822613	1.13239	0.467568	-0.875384	1.13046	0.438718
finn-b-C3_LIP_ORAL_PHARYNX	Malignant neoplasm of lip, oral cavity and pharynx || id:finn-b-C3_LIP_ORAL_PHARYNX	smoking initiation || id:ieu-b-4877	-0.127491	0.503484	0.800099	-0.122326	0.503525	0.808052	-0.127491	0.503484	0.800099
finn-b-C3_LIP_ORAL_PHARYNX_EXALLC	"Malignant neoplasm of lip, oral cavity and pharynx" (all cancers excluded) || id:finn-b-C3_LIP_ORAL_PHARYNX_EXALLC	Standard tea intake || id:ukb-b-3291	-0.00694081	0.00584026	0.23466	-0.0115158	0.00819349	0.159878	-0.00694081	0.00584026	0.23466	199.805	0.716147	199.254	0.70888
finn-b-C3_LIP_ORAL_PHARYNX_EXALLC	"Malignant neoplasm of lip, oral cavity and pharynx" (all cancers excluded) || id:finn-b-C3_LIP_ORAL_PHARYNX_EXALLC	Alcoholic drinks per week || id:ieu-b-73	-0.869591	1.13169	0.44225	-0.816789	1.13363	0.471214	-0.869591	1.13169	0.44225
finn-b-C3_LIP_ORAL_PHARYNX_EXALLC	"Malignant neoplasm of lip, oral cavity and pharynx" (all cancers excluded) || id:finn-b-C3_LIP_ORAL_PHARYNX_EXALLC	smoking initiation || id:ieu-b-4877	-0.119226	0.504128	0.813045	-0.114222	0.504167	0.820769	-0.119226	0.504128	0.813045
finn-b-C3_LARYNX	Malignant neoplasm of larynx || id:finn-b-C3_LARYNX	Standard tea intake || id:ukb-b-3291	-0.000852445	0.00554437	0.877807	-0.00758805	0.00776345	0.328368	-0.00306109	0.00506539	0.545634	267.96	0.00551984	267.906	0.00485555
finn-b-C3_LARYNX	Malignant neoplasm of larynx || id:finn-b-C3_LARYNX	Alcoholic drinks per week || id:ieu-b-73	0.597042	1.07599	0.57898	0.673997	1.07644	0.531228	0.0944974	0.9734	0.922663
finn-b-C3_LARYNX	Malignant neoplasm of larynx || id:finn-b-C3_LARYNX	smoking initiation || id:ieu-b-4877	0.181694	0.478714	0.704282	0.189599	0.478157	0.691721	0.464634	0.433115	0.283373
finn-b-C3_LARYNX_EXALLC	Malignant neoplasm of larynx (all cancers excluded) || id:finn-b-C3_LARYNX_EXALLC	Standard tea intake || id:ukb-b-3291	-0.000749556	0.00553283	0.892237	-0.00753586	0.00774963	0.330844	-0.00323698	0.0050744	0.523536	266.061	0.00690322	266.011	0.00608819
finn-b-C3_LARYNX_EXALLC	Malignant neoplasm of larynx (all cancers excluded) || id:finn-b-C3_LARYNX_EXALLC	Alcoholic drinks per week || id:ieu-b-73	0.582477	1.0735	0.587409	0.660263	1.0739	0.538668	0.299678	0.979858	0.759728
finn-b-C3_LARYNX_EXALLC	Malignant neoplasm of larynx (all cancers excluded) || id:finn-b-C3_LARYNX_EXALLC	smoking initiation || id:ieu-b-4877	0.190886	0.477714	0.689464	0.198624	0.477125	0.677195	0.426571	0.43421	0.3259
ieu-b-89	Oral cavity and pharyngeal cancer || id:ieu-b-89	Added milk to standard tea || id:ukb-b-5209	-0.00869875	0.459715	0.984903	0.280495	0.68027	0.680099	-0.0501512	0.420614	0.905091	261.306	0.0118359	260.861	0.0109942
ieu-b-89	Oral cavity and pharyngeal cancer || id:ieu-b-89	Alcoholic drinks per week || id:ieu-b-73	0.411933	0.429494	0.337502	0.421161	0.430467	0.327885	0.340309	0.390351	0.383315
ieu-b-89	Oral cavity and pharyngeal cancer || id:ieu-b-89	smoking initiation || id:ieu-b-4877	0.435618	0.189519	0.0215309	0.431615	0.189944	0.0230671	0.40432	0.178111	0.0232045
ieu-b-94	Oral cavity cancer || id:ieu-b-94	Added milk to standard tea || id:ukb-b-5209	0.301876	0.532613	0.570862	0.618925	0.788284	0.432363	0.287878	0.510175	0.572568	233.104	0.152711	232.314	0.149934
ieu-b-94	Oral cavity cancer || id:ieu-b-94	Alcoholic drinks per week || id:ieu-b-73	0.390605	0.498282	0.433097	0.401413	0.499501	0.421611	0.351673	0.479914	0.46369
ieu-b-94	Oral cavity cancer || id:ieu-b-94	smoking initiation || id:ieu-b-4877	0.681064	0.219745	0.00193953	0.676734	0.220252	0.00212242	0.589689	0.210895	0.00517195
ieu-b-96	Oropharyngeal cancer || id:ieu-b-96	Added milk to standard tea || id:ukb-b-5209	0.0272214	0.640827	0.966117	0.262847	0.947583	0.781483	-0.539146	0.568604	0.343031	287.129	0.000448692	287.084	0.00038235
ieu-b-96	Oropharyngeal cancer || id:ieu-b-96	Alcoholic drinks per week || id:ieu-b-73	0.291855	0.599935	0.626628	0.299185	0.601583	0.618956	0.101111	0.524881	0.847244
ieu-b-96	Oropharyngeal cancer || id:ieu-b-96	smoking initiation || id:ieu-b-4877	0.113848	0.264595	0.666996	0.110857	0.265297	0.676048	0.0655347	0.238872	0.783815
ieu-b-90	Oral cavity and pharyngeal cancer || id:ieu-b-90	Added milk to standard tea || id:ukb-b-5209	-0.1668	0.480688	0.72859	-0.430043	0.709994	0.544714	-0.24816	0.445624	0.577608	264.533	0.00934843	263.715	0.00904047
ieu-b-90	Oral cavity and pharyngeal cancer || id:ieu-b-90	Alcoholic drinks per week || id:ieu-b-73	0.949933	0.448584	0.0342069	0.942103	0.449639	0.0361494	0.910823	0.415963	0.0285481
ieu-b-90	Oral cavity and pharyngeal cancer || id:ieu-b-90	smoking initiation || id:ieu-b-4877	0.365044	0.197977	0.0652017	0.368793	0.198463	0.0631343	0.223869	0.184158	0.224124
ieu-b-93	Oral cavity cancer || id:ieu-b-93	Added milk to standard tea || id:ukb-b-5209	-0.262496	0.568533	0.644291	-0.209494	0.838873	0.802794	-0.118723	0.534134	0.824102	248.2	0.0493162	247.328	0.0483911
ieu-b-93	Oral cavity cancer || id:ieu-b-93	Alcoholic drinks per week || id:ieu-b-73	1.45732	0.530575	0.00602029	1.45896	0.532159	0.00611424	1.43225	0.504989	0.00456545
ieu-b-93	Oral cavity cancer || id:ieu-b-93	smoking initiation || id:ieu-b-4877	0.0545237	0.234488	0.816132	0.0537648	0.235201	0.819187	-0.0180672	0.220631	0.934735
ieu-b-97	Oropharyngeal cancer || id:ieu-b-97	Added milk to standard tea || id:ukb-b-5209	0.0668879	0.563879	0.905576	-0.562886	0.83232	0.49886	0.0327265	0.55413	0.952905	228.186	0.226301	227.563	0.22058
ieu-b-97	Oropharyngeal cancer || id:ieu-b-97	Alcoholic drinks per week || id:ieu-b-73	0.46293	0.5272	0.379895	0.443729	0.527459	0.400204	0.471154	0.51798	0.363034
ieu-b-97	Oropharyngeal cancer || id:ieu-b-97	smoking initiation || id:ieu-b-4877	0.772218	0.232117	0.000878321	0.780947	0.23224	0.000771917	0.729482	0.228516	0.00141163
finn-b-C3_LIP_ORAL_PHARYNX	Malignant neoplasm of lip, oral cavity and pharynx || id:finn-b-C3_LIP_ORAL_PHARYNX	Added milk to standard tea || id:ukb-b-5209	-2.27316	1.2329	0.06522	1.06985	1.81802	0.556217	-2.27316	1.2329	0.06522	198.482	0.738402	196.641	0.75265
finn-b-C3_LIP_ORAL_PHARYNX	Malignant neoplasm of lip, oral cavity and pharynx || id:finn-b-C3_LIP_ORAL_PHARYNX	Alcoholic drinks per week || id:ieu-b-73	-0.752367	1.13937	0.509039	-0.32869	1.15189	0.775376	-0.752367	1.13937	0.509039
finn-b-C3_LIP_ORAL_PHARYNX	Malignant neoplasm of lip, oral cavity and pharynx || id:finn-b-C3_LIP_ORAL_PHARYNX	smoking initiation || id:ieu-b-4877	-0.308703	0.508506	0.543798	-0.407248	0.510029	0.424591	-0.308703	0.508506	0.543798
finn-b-C3_LIP_ORAL_PHARYNX_EXALLC	"Malignant neoplasm of lip, oral cavity and pharynx" (all cancers excluded) || id:finn-b-C3_LIP_ORAL_PHARYNX_EXALLC	Added milk to standard tea || id:ukb-b-5209	-2.21119	1.2344	0.0732437	1.12043	1.81997	0.538136	-2.21119	1.2344	0.0732437	199.689	0.718136	197.939	0.731312
finn-b-C3_LIP_ORAL_PHARYNX_EXALLC	"Malignant neoplasm of lip, oral cavity and pharynx" (all cancers excluded) || id:finn-b-C3_LIP_ORAL_PHARYNX_EXALLC	Alcoholic drinks per week || id:ieu-b-73	-0.741077	1.1406	0.51587	-0.319118	1.15311	0.781975	-0.741077	1.1406	0.51587
finn-b-C3_LIP_ORAL_PHARYNX_EXALLC	"Malignant neoplasm of lip, oral cavity and pharynx" (all cancers excluded) || id:finn-b-C3_LIP_ORAL_PHARYNX_EXALLC	smoking initiation || id:ieu-b-4877	-0.296829	0.509206	0.559944	-0.394855	0.510724	0.439446	-0.296829	0.509206	0.559944
finn-b-C3_LARYNX	Malignant neoplasm of larynx || id:finn-b-C3_LARYNX	Added milk to standard tea || id:ukb-b-5209	2.0129	1.1668	0.0845009	2.34149	1.72509	0.17468	2.44519	1.0582	0.0208497	264.914	0.00788345	262.336	0.00931519
finn-b-C3_LARYNX	Malignant neoplasm of larynx || id:finn-b-C3_LARYNX	Alcoholic drinks per week || id:ieu-b-73	0.70075	1.07838	0.515809	0.742478	1.09269	0.496825	0.281647	0.982984	0.774478
finn-b-C3_LARYNX	Malignant neoplasm of larynx || id:finn-b-C3_LARYNX	smoking initiation || id:ieu-b-4877	0.257404	0.480605	0.592247	0.247664	0.483131	0.608215	0.464682	0.438381	0.289146
finn-b-C3_LARYNX_EXALLC	Malignant neoplasm of larynx (all cancers excluded) || id:finn-b-C3_LARYNX_EXALLC	Added milk to standard tea || id:ukb-b-5209	2.08005	1.16301	0.0736955	2.36602	1.71909	0.168722	2.50583	1.05699	0.017753	262.531	0.0103309	259.816	0.0123422
finn-b-C3_LARYNX_EXALLC	Malignant neoplasm of larynx (all cancers excluded) || id:finn-b-C3_LARYNX_EXALLC	Alcoholic drinks per week || id:ieu-b-73	0.695299	1.07485	0.517709	0.731671	1.08918	0.501735	0.278461	0.981812	0.776702
finn-b-C3_LARYNX_EXALLC	Malignant neoplasm of larynx (all cancers excluded) || id:finn-b-C3_LARYNX_EXALLC	smoking initiation || id:ieu-b-4877	0.270442	0.479196	0.572505	0.261993	0.481721	0.586531	0.473832	0.438004	0.279342
ieu-b-89	Oral cavity and pharyngeal cancer || id:ieu-b-89	Decaffeinated tea || id:ukb-b-8553	1.5875	1.12091	0.156698	1.84729	1.6812	0.271858	1.8102	1.03922	0.0815291	258.445	0.0127027	255.717	0.0151535
ieu-b-89	Oral cavity and pharyngeal cancer || id:ieu-b-89	Alcoholic drinks per week || id:ieu-b-73	0.552103	0.435527	0.204917	0.548331	0.4369	0.209461	0.545451	0.39879	0.171386
ieu-b-89	Oral cavity and pharyngeal cancer || id:ieu-b-89	smoking initiation || id:ieu-b-4877	0.464266	0.189318	0.0141946	0.467848	0.190533	0.0140703	0.423829	0.177795	0.0171346
ieu-b-94	Oral cavity cancer || id:ieu-b-94	Decaffeinated tea || id:ukb-b-8553	0.934271	1.29996	0.472332	2.89702	1.94246	0.135852	1.69245	1.25175	0.176353	230.559	0.157572	229.513	0.15754
ieu-b-94	Oral cavity cancer || id:ieu-b-94	Alcoholic drinks per week || id:ieu-b-73	0.478485	0.505611	0.34397	0.449092	0.505063	0.373906	0.443418	0.486742	0.362299
ieu-b-94	Oral cavity cancer || id:ieu-b-94	smoking initiation || id:ieu-b-4877	0.686637	0.21951	0.00175973	0.713808	0.219983	0.00117519	0.658409	0.210113	0.00172674
ieu-b-96	Oropharyngeal cancer || id:ieu-b-96	Decaffeinated tea || id:ukb-b-8553	2.35826	1.55467	0.129296	0.65317	2.32598	0.778852	1.03182	1.38391	0.455917	282.234	0.000645626	279.319	0.000824734
ieu-b-96	Oropharyngeal cancer || id:ieu-b-96	Alcoholic drinks per week || id:ieu-b-73	0.473612	0.606583	0.434928	0.49966	0.6072	0.410569	0.136307	0.53443	0.798684
ieu-b-96	Oropharyngeal cancer || id:ieu-b-96	smoking initiation || id:ieu-b-4877	0.157033	0.263445	0.551126	0.132885	0.2646	0.615519	0.0484406	0.240491	0.840367
ieu-b-90	Oral cavity and pharyngeal cancer || id:ieu-b-90	Decaffeinated tea || id:ukb-b-8553	0.381403	1.16882	0.744185	0.316552	1.75967	0.857237	1.69645	1.09744	0.122149	260.089	0.0119766	259.289	0.0115725
ieu-b-90	Oral cavity and pharyngeal cancer || id:ieu-b-90	Alcoholic drinks per week || id:ieu-b-73	0.914075	0.453784	0.0439739	0.914925	0.455186	0.0444309	0.931237	0.423421	0.0278552
ieu-b-90	Oral cavity and pharyngeal cancer || id:ieu-b-90	smoking initiation || id:ieu-b-4877	0.383774	0.197157	0.0515905	0.382902	0.198411	0.0536263	0.295054	0.183968	0.108752
ieu-b-93	Oral cavity cancer || id:ieu-b-93	Decaffeinated tea || id:ukb-b-8553	0.682908	1.38731	0.622541	0.310352	2.08907	0.881901	1.55083	1.33193	0.244282	244.641	0.0559271	243.711	0.0551931
ieu-b-93	Oral cavity cancer || id:ieu-b-93	Alcoholic drinks per week || id:ieu-b-73	1.45974	0.537336	0.00659498	1.46444	0.538898	0.00657847	1.57744	0.517385	0.00229696
ieu-b-93	Oral cavity cancer || id:ieu-b-93	smoking initiation || id:ieu-b-4877	0.0791096	0.233833	0.735125	0.0741307	0.235282	0.752707	-0.0157938	0.220263	0.942837
ieu-b-97	Oropharyngeal cancer || id:ieu-b-97	Decaffeinated tea || id:ukb-b-8553	-0.27264	1.36842	0.842077	-0.139017	2.06066	0.946214	0.33064	1.35917	0.8078	223.968	0.257498	223.362	0.251103
ieu-b-97	Oropharyngeal cancer || id:ieu-b-97	Alcoholic drinks per week || id:ieu-b-73	0.362086	0.532751	0.496723	0.360317	0.534396	0.500152	0.414139	0.52348	0.428869
ieu-b-97	Oropharyngeal cancer || id:ieu-b-97	smoking initiation || id:ieu-b-4877	0.769323	0.230957	0.000865264	0.771129	0.232434	0.000907837	0.73805	0.227055	0.00115189
finn-b-C3_LIP_ORAL_PHARYNX	Malignant neoplasm of lip, oral cavity and pharynx || id:finn-b-C3_LIP_ORAL_PHARYNX	Decaffeinated tea || id:ukb-b-8553	-4.7709	3.05148	0.117941	-3.06336	4.61241	0.50659	-4.7709	3.05148	0.117941	197.53	0.721821	195.811	0.734475
finn-b-C3_LIP_ORAL_PHARYNX	Malignant neoplasm of lip, oral cavity and pharynx || id:finn-b-C3_LIP_ORAL_PHARYNX	Alcoholic drinks per week || id:ieu-b-73	-1.1803	1.14701	0.303469	-1.19492	1.14739	0.297679	-1.1803	1.14701	0.303469
finn-b-C3_LIP_ORAL_PHARYNX	Malignant neoplasm of lip, oral cavity and pharynx || id:finn-b-C3_LIP_ORAL_PHARYNX	smoking initiation || id:ieu-b-4877	-0.255785	0.507178	0.614029	-0.231043	0.509648	0.650305	-0.255785	0.507178	0.614029
finn-b-C3_LIP_ORAL_PHARYNX_EXALLC	"Malignant neoplasm of lip, oral cavity and pharynx" (all cancers excluded) || id:finn-b-C3_LIP_ORAL_PHARYNX_EXALLC	Decaffeinated tea || id:ukb-b-8553	-4.82886	3.05323	0.113751	-3.32393	4.61467	0.471343	-4.82886	3.05323	0.113751	198.419	0.706478	196.659	0.720111
finn-b-C3_LIP_ORAL_PHARYNX_EXALLC	"Malignant neoplasm of lip, oral cavity and pharynx" (all cancers excluded) || id:finn-b-C3_LIP_ORAL_PHARYNX_EXALLC	Alcoholic drinks per week || id:ieu-b-73	-1.17643	1.14823	0.305571	-1.18957	1.14863	0.300368	-1.17643	1.14823	0.305571
finn-b-C3_LIP_ORAL_PHARYNX_EXALLC	"Malignant neoplasm of lip, oral cavity and pharynx" (all cancers excluded) || id:finn-b-C3_LIP_ORAL_PHARYNX_EXALLC	smoking initiation || id:ieu-b-4877	-0.247999	0.507857	0.62532	-0.226124	0.510341	0.657705	-0.247999	0.507857	0.62532
finn-b-C3_LARYNX	Malignant neoplasm of larynx || id:finn-b-C3_LARYNX	Decaffeinated tea || id:ukb-b-8553	0.779135	2.90197	0.788326	1.66512	4.39618	0.704862	-0.485431	2.63239	0.853694	265.423	0.0057135	265.299	0.00506782
finn-b-C3_LARYNX	Malignant neoplasm of larynx || id:finn-b-C3_LARYNX	Alcoholic drinks per week || id:ieu-b-73	0.633117	1.09184	0.562008	0.625527	1.09463	0.567693	0.229635	0.987759	0.816164
finn-b-C3_LARYNX	Malignant neoplasm of larynx || id:finn-b-C3_LARYNX	smoking initiation || id:ieu-b-4877	0.18797	0.482128	0.696628	0.200838	0.485563	0.679153	0.406067	0.435839	0.351497
finn-b-C3_LARYNX_EXALLC	Malignant neoplasm of larynx (all cancers excluded) || id:finn-b-C3_LARYNX_EXALLC	Decaffeinated tea || id:ukb-b-8553	0.742697	2.89295	0.79739	1.33521	4.38295	0.760642	-0.524142	2.63438	0.842292	263.395	0.00725532	263.279	0.00644884
finn-b-C3_LARYNX_EXALLC	Malignant neoplasm of larynx (all cancers excluded) || id:finn-b-C3_LARYNX_EXALLC	Alcoholic drinks per week || id:ieu-b-73	0.620217	1.08898	0.568991	0.615022	1.09188	0.573251	0.217696	0.988944	0.82577
finn-b-C3_LARYNX_EXALLC	Malignant neoplasm of larynx (all cancers excluded) || id:finn-b-C3_LARYNX_EXALLC	smoking initiation || id:ieu-b-4877	0.196407	0.481019	0.683043	0.205027	0.484496	0.672167	0.4102	0.436501	0.347348
ieu-b-89	Oral cavity and pharyngeal cancer || id:ieu-b-89	Added milk to rooibos tea || id:ukb-b-11491	3.56557	1.77326	0.0443525	1.06147	2.56375	0.678852	3.81483	1.64492	0.0203865	259.791	0.0139669	255.103	0.020418
ieu-b-89	Oral cavity and pharyngeal cancer || id:ieu-b-89	Alcoholic drinks per week || id:ieu-b-73	0.497456	0.429218	0.246463	0.557826	0.430715	0.19528	0.645146	0.394257	0.101765
ieu-b-89	Oral cavity and pharyngeal cancer || id:ieu-b-89	smoking initiation || id:ieu-b-4877	0.417895	0.188061	0.0262745	0.402789	0.18803	0.0321814	0.292872	0.174989	0.0941986
ieu-b-94	Oral cavity cancer || id:ieu-b-94	Added milk to rooibos tea || id:ukb-b-11491	3.8091	2.04096	0.0619959	3.17922	2.94825	0.280881	3.32629	1.96127	0.0898894	231.039	0.176074	227.558	0.20665
ieu-b-94	Oral cavity cancer || id:ieu-b-94	Alcoholic drinks per week || id:ieu-b-73	0.476668	0.497079	0.33759	0.492213	0.5009	0.325776	0.435888	0.480616	0.364441
ieu-b-94	Oral cavity cancer || id:ieu-b-94	smoking initiation || id:ieu-b-4877	0.648308	0.21777	0.00291056	0.644431	0.218631	0.00320285	0.523994	0.210441	0.0127749
ieu-b-96	Oropharyngeal cancer || id:ieu-b-96	Added milk to rooibos tea || id:ukb-b-11491	6.0042	2.44769	0.0141666	2.66718	3.53922	0.451085	5.70865	2.1559	0.00809885	280.086	0.00118853	273.107	0.00254884
ieu-b-96	Oropharyngeal cancer || id:ieu-b-96	Alcoholic drinks per week || id:ieu-b-73	0.415069	0.593799	0.484548	0.495445	0.596021	0.40583	0.116515	0.523574	0.823896
ieu-b-96	Oropharyngeal cancer || id:ieu-b-96	smoking initiation || id:ieu-b-4877	0.0867079	0.260023	0.738785	0.0663799	0.260064	0.798534	0.133999	0.234728	0.568087
ieu-b-90	Oral cavity and pharyngeal cancer || id:ieu-b-90	Added milk to rooibos tea || id:ukb-b-11491	-0.563468	1.85484	0.761293	2.86599	2.67858	0.284635	-1.58378	1.82517	0.385534	263.849	0.0100956	263.088	0.00970435
ieu-b-90	Oral cavity and pharyngeal cancer || id:ieu-b-90	Alcoholic drinks per week || id:ieu-b-73	0.888933	0.449188	0.0478185	0.809322	0.449234	0.0716146	0.814835	0.41713	0.0507681
ieu-b-90	Oral cavity and pharyngeal cancer || id:ieu-b-90	smoking initiation || id:ieu-b-4877	0.382085	0.196716	0.0520993	0.4002	0.196012	0.0411804	0.245238	0.1828	0.179738
ieu-b-93	Oral cavity cancer || id:ieu-b-93	Added milk to rooibos tea || id:ukb-b-11491	-2.73418	2.20676	0.215346	-0.0478362	3.21784	0.988139	-5.27478	2.11421	0.0125984	246.323	0.0583053	244.296	0.0633582
ieu-b-93	Oral cavity cancer || id:ieu-b-93	Alcoholic drinks per week || id:ieu-b-73	1.36631	0.530035	0.00994397	1.30502	0.532336	0.0142265	1.16099	0.504203	0.0213
ieu-b-93	Oral cavity cancer || id:ieu-b-93	smoking initiation || id:ieu-b-4877	0.0815047	0.232437	0.725849	0.0948485	0.232558	0.683384	0.0239478	0.220183	0.91339
ieu-b-97	Oropharyngeal cancer || id:ieu-b-97	Added milk to rooibos tea || id:ukb-b-11491	2.3468	2.17758	0.281164	6.2309	3.13531	0.0468858	3.69299	2.13156	0.0831801	228.978	0.215433	227.482	0.221687
ieu-b-97	Oropharyngeal cancer || id:ieu-b-97	Alcoholic drinks per week || id:ieu-b-73	0.441347	0.529548	0.404596	0.350689	0.529797	0.508016	0.552735	0.5153	0.283429
ieu-b-97	Oropharyngeal cancer || id:ieu-b-97	smoking initiation || id:ieu-b-4877	0.768179	0.23134	0.000898362	0.78913	0.230618	0.000622052	0.781382	0.22512	0.000518605
finn-b-C3_LIP_ORAL_PHARYNX	Malignant neoplasm of lip, oral cavity and pharynx || id:finn-b-C3_LIP_ORAL_PHARYNX	Added milk to rooibos tea || id:ukb-b-11491	-3.42453	4.63066	0.459583	-7.54394	6.49868	0.245706	-3.42453	4.63066	0.459583	203.783	0.663037	203.434	0.651454
finn-b-C3_LIP_ORAL_PHARYNX	Malignant neoplasm of lip, oral cavity and pharynx || id:finn-b-C3_LIP_ORAL_PHARYNX	Alcoholic drinks per week || id:ieu-b-73	0.164806	1.16184	0.887199	0.301583	1.17166	0.796872	0.164806	1.16184	0.887199
finn-b-C3_LIP_ORAL_PHARYNX	Malignant neoplasm of lip, oral cavity and pharynx || id:finn-b-C3_LIP_ORAL_PHARYNX	smoking initiation || id:ieu-b-4877	-0.21518	0.509981	0.673071	-0.244342	0.511002	0.632534	-0.21518	0.509981	0.673071
finn-b-C3_LIP_ORAL_PHARYNX_EXALLC	"Malignant neoplasm of lip, oral cavity and pharynx" (all cancers excluded) || id:finn-b-C3_LIP_ORAL_PHARYNX_EXALLC	Added milk to rooibos tea || id:ukb-b-11491	-3.25861	4.63815	0.482326	-7.31288	6.51003	0.261299	-3.25861	4.63815	0.482326	204.75	0.645267	204.433	0.632878
finn-b-C3_LIP_ORAL_PHARYNX_EXALLC	"Malignant neoplasm of lip, oral cavity and pharynx" (all cancers excluded) || id:finn-b-C3_LIP_ORAL_PHARYNX_EXALLC	Alcoholic drinks per week || id:ieu-b-73	0.183858	1.16329	0.874418	0.318469	1.17314	0.786032	0.183858	1.16329	0.874418
finn-b-C3_LIP_ORAL_PHARYNX_EXALLC	"Malignant neoplasm of lip, oral cavity and pharynx" (all cancers excluded) || id:finn-b-C3_LIP_ORAL_PHARYNX_EXALLC	smoking initiation || id:ieu-b-4877	-0.215498	0.51068	0.673037	-0.244316	0.511711	0.633043	-0.215498	0.51068	0.673037
finn-b-C3_LARYNX	Malignant neoplasm of larynx || id:finn-b-C3_LARYNX	Added milk to rooibos tea || id:ukb-b-11491	-2.77704	4.4161	0.529451	-2.89144	6.22281	0.642181	-5.57623	4.02659	0.166097	269.861	0.00503085	269.327	0.00468581
finn-b-C3_LARYNX	Malignant neoplasm of larynx || id:finn-b-C3_LARYNX	Alcoholic drinks per week || id:ieu-b-73	1.17341	1.10713	0.289206	1.17721	1.1192	0.292879	0.269872	1.01583	0.790496
finn-b-C3_LARYNX	Malignant neoplasm of larynx || id:finn-b-C3_LARYNX	smoking initiation || id:ieu-b-4877	-0.245015	0.485468	0.61377	-0.245829	0.487605	0.614152	-0.00968704	0.447248	0.98272
finn-b-C3_LARYNX_EXALLC	Malignant neoplasm of larynx (all cancers excluded) || id:finn-b-C3_LARYNX_EXALLC	Added milk to rooibos tea || id:ukb-b-11491	-2.57422	4.40897	0.559314	-2.55889	6.21466	0.680522	-4.3236	4.01925	0.282051	267.967	0.00629714	267.494	0.00583373
finn-b-C3_LARYNX_EXALLC	Malignant neoplasm of larynx (all cancers excluded) || id:finn-b-C3_LARYNX_EXALLC	Alcoholic drinks per week || id:ieu-b-73	1.17025	1.10478	0.28948	1.16975	1.11681	0.294915	0.649638	1.01153	0.520722
finn-b-C3_LARYNX_EXALLC	Malignant neoplasm of larynx (all cancers excluded) || id:finn-b-C3_LARYNX_EXALLC	smoking initiation || id:ieu-b-4877	-0.243512	0.484534	0.615267	-0.243402	0.486676	0.616983	0.0440396	0.446718	0.921468
ieu-b-89	Oral cavity and pharyngeal cancer || id:ieu-b-89	Tea consumed || id:ukb-b-17988	0.963741	1.14775	0.401088	3.90646	1.70761	0.0221565	1.5428	1.07451	0.151055	262.096	0.00957224	260.914	0.00964623
ieu-b-89	Oral cavity and pharyngeal cancer || id:ieu-b-89	Alcoholic drinks per week || id:ieu-b-73	0.374322	0.426541	0.380175	0.436825	0.4231	0.301867	0.393194	0.387406	0.310135
ieu-b-89	Oral cavity and pharyngeal cancer || id:ieu-b-89	smoking initiation || id:ieu-b-4877	0.463657	0.189323	0.0143246	0.463171	0.187411	0.0134579	0.424037	0.177732	0.0170408
ieu-b-94	Oral cavity cancer || id:ieu-b-94	Tea consumed || id:ukb-b-17988	1.07656	1.33188	0.418917	4.94108	1.97457	0.0123368	1.34445	1.27134	0.290282	234.223	0.130578	233.107	0.131174
ieu-b-94	Oral cavity cancer || id:ieu-b-94	Alcoholic drinks per week || id:ieu-b-73	0.316593	0.495325	0.522717	0.398991	0.489583	0.415094	0.286951	0.474903	0.54569
ieu-b-94	Oral cavity cancer || id:ieu-b-94	smoking initiation || id:ieu-b-4877	0.70545	0.219759	0.00132686	0.704198	0.216764	0.00115938	0.617915	0.209834	0.00323185
ieu-b-96	Oropharyngeal cancer || id:ieu-b-96	Tea consumed || id:ukb-b-17988	0.834905	1.59388	0.600404	3.25737	2.38712	0.172391	-0.638386	1.43356	0.656092	286.639	0.000407565	286.27	0.000363454
ieu-b-96	Oropharyngeal cancer || id:ieu-b-96	Alcoholic drinks per week || id:ieu-b-73	0.329093	0.594468	0.579858	0.379417	0.594423	0.523281	0.210318	0.524732	0.68856
ieu-b-96	Oropharyngeal cancer || id:ieu-b-96	smoking initiation || id:ieu-b-4877	0.127026	0.263685	0.629997	0.126908	0.263155	0.629625	0.0598342	0.239866	0.803014
ieu-b-90	Oral cavity and pharyngeal cancer || id:ieu-b-90	Tea consumed || id:ukb-b-17988	-0.342774	1.18962	0.773241	0.873824	1.79063	0.625552	0.114013	1.12195	0.919058	261.095	0.0121143	260.376	0.0116034
ieu-b-90	Oral cavity and pharyngeal cancer || id:ieu-b-90	Alcoholic drinks per week || id:ieu-b-73	0.872205	0.441874	0.0483957	0.898285	0.442984	0.04258	0.805462	0.411879	0.0505146
ieu-b-90	Oral cavity and pharyngeal cancer || id:ieu-b-90	smoking initiation || id:ieu-b-4877	0.376715	0.196194	0.0548433	0.377471	0.196276	0.0544593	0.278757	0.183729	0.129213
ieu-b-93	Oral cavity cancer || id:ieu-b-93	Tea consumed || id:ukb-b-17988	-0.660333	1.41114	0.639826	1.89166	2.11373	0.370819	-0.862799	1.31808	0.512732	245.909	0.0549874	245.12	0.0535865
ieu-b-93	Oral cavity cancer || id:ieu-b-93	Alcoholic drinks per week || id:ieu-b-73	1.34423	0.523599	0.0102498	1.39926	0.522727	0.00743189	1.18802	0.496392	0.016697
ieu-b-93	Oral cavity cancer || id:ieu-b-93	smoking initiation || id:ieu-b-4877	0.0680497	0.232787	0.770037	0.0703032	0.23191	0.761777	0.0171404	0.219036	0.937626
ieu-b-97	Oropharyngeal cancer || id:ieu-b-97	Tea consumed || id:ukb-b-17988	0.508077	1.39477	0.715655	0.72818	2.10501	0.729397	0.48701	1.37005	0.722238	225.461	0.250604	224.755	0.24578
ieu-b-97	Oropharyngeal cancer || id:ieu-b-97	Alcoholic drinks per week || id:ieu-b-73	0.419128	0.519439	0.419732	0.423996	0.521806	0.416473	0.426534	0.510229	0.403174
ieu-b-97	Oropharyngeal cancer || id:ieu-b-97	smoking initiation || id:ieu-b-4877	0.783939	0.230124	0.00065777	0.78407	0.230659	0.000675704	0.742372	0.226478	0.00104584
finn-b-C3_LIP_ORAL_PHARYNX	Malignant neoplasm of lip, oral cavity and pharynx || id:finn-b-C3_LIP_ORAL_PHARYNX	Tea consumed || id:ukb-b-17988	-3.89514	2.93839	0.184971	-6.53356	4.46478	0.143371	-3.89514	2.93839	0.184971	200.172	0.709839	198.994	0.713381
finn-b-C3_LIP_ORAL_PHARYNX	Malignant neoplasm of lip, oral cavity and pharynx || id:finn-b-C3_LIP_ORAL_PHARYNX	Alcoholic drinks per week || id:ieu-b-73	-0.612111	1.12187	0.585328	-0.656326	1.12328	0.559023	-0.612111	1.12187	0.585328
finn-b-C3_LIP_ORAL_PHARYNX	Malignant neoplasm of lip, oral cavity and pharynx || id:finn-b-C3_LIP_ORAL_PHARYNX	smoking initiation || id:ieu-b-4877	-0.192108	0.502088	0.702003	-0.231382	0.504576	0.646545	-0.192108	0.502088	0.702003
finn-b-C3_LIP_ORAL_PHARYNX_EXALLC	"Malignant neoplasm of lip, oral cavity and pharynx" (all cancers excluded) || id:finn-b-C3_LIP_ORAL_PHARYNX_EXALLC	Tea consumed || id:ukb-b-17988	-3.93997	2.94127	0.180392	-6.81788	4.46887	0.1271	-3.93997	2.94127	0.180392	201.19	0.692044	199.986	0.696084
finn-b-C3_LIP_ORAL_PHARYNX_EXALLC	"Malignant neoplasm of lip, oral cavity and pharynx" (all cancers excluded) || id:finn-b-C3_LIP_ORAL_PHARYNX_EXALLC	Alcoholic drinks per week || id:ieu-b-73	-0.597054	1.12318	0.595021	-0.645605	1.12462	0.565922	-0.597054	1.12318	0.595021
finn-b-C3_LIP_ORAL_PHARYNX_EXALLC	"Malignant neoplasm of lip, oral cavity and pharynx" (all cancers excluded) || id:finn-b-C3_LIP_ORAL_PHARYNX_EXALLC	smoking initiation || id:ieu-b-4877	-0.184206	0.502743	0.714065	-0.227091	0.505237	0.65309	-0.184206	0.502743	0.714065
finn-b-C3_LARYNX	Malignant neoplasm of larynx || id:finn-b-C3_LARYNX	Tea consumed || id:ukb-b-17988	-1.24745	2.799	0.65583	-10.3747	4.18414	0.0131554	-1.00551	2.52736	0.690742	267.705	0.00568982	267.452	0.00512794
finn-b-C3_LARYNX	Malignant neoplasm of larynx || id:finn-b-C3_LARYNX	Alcoholic drinks per week || id:ieu-b-73	0.846993	1.0671	0.427352	0.693019	1.05034	0.509378	0.738442	0.970853	0.446889
finn-b-C3_LARYNX	Malignant neoplasm of larynx || id:finn-b-C3_LARYNX	smoking initiation || id:ieu-b-4877	0.143763	0.477107	0.763169	0.0093746	0.4713	0.98413	0.340411	0.432064	0.430771
finn-b-C3_LARYNX_EXALLC	Malignant neoplasm of larynx (all cancers excluded) || id:finn-b-C3_LARYNX_EXALLC	Tea consumed || id:ukb-b-17988	-1.28507	2.79192	0.645313	-10.7013	4.16705	0.0102268	-1.03344	2.52979	0.682901	265.815	0.00710304	265.553	0.00642555
finn-b-C3_LARYNX_EXALLC	Malignant neoplasm of larynx (all cancers excluded) || id:finn-b-C3_LARYNX_EXALLC	Alcoholic drinks per week || id:ieu-b-73	0.844618	1.06478	0.427643	0.683888	1.04662	0.513481	0.737382	0.972144	0.448145
finn-b-C3_LARYNX_EXALLC	Malignant neoplasm of larynx (all cancers excluded) || id:finn-b-C3_LARYNX_EXALLC	smoking initiation || id:ieu-b-4877	0.151954	0.476131	0.749617	0.0132093	0.469678	0.977563	0.344292	0.432707	0.426224
Table S3. Results of MVMR.SE: Standard Error; Pval: P value.

## Sheet: Sheet2
				MR_IVW1_Heter	152.573	0.0415674
				MR_IVW2_Heter	137.209	0.196913
				MR_IVW3_Heter	169.687	0.00405779
				MR_IVW4_Heter	153.375	0.0431022
				MR_IVW5_Heter	149.925	0.063772
				MR_IVW6_Heter	124.888	0.48601
				MR_IVW7_Heter	113.467	0.94476
				MR_IVW8_Heter	114.331	0.937831
				MR_IVW9_Heter	164.659	0.0677598
				MR_IVW10_Heter	164.127	0.0715772
