# Supplementary material for: Causal association between tea consumption and head and neck cancer: a Mendelian randomization study
Source: Royal Society of Chemistry journal article supplement (doi:10.1039/d3fo04017h), 2024-01-01
Supplement: d3fo04017h5.xlsx [file d3fo04017h5.xlsx]

## Sheet: Sheet1
Pval thershold of IV extraction	GWAS id of exposure	GWAS id of outcome	Outcome	Exposure	Heterogeneity				Pleiotrophy
					Inverse variance weighted		MR Egger		MR Egger
					Q	Q_pval	Q	Q_pval	Egger_intercept	SE	Pval
5e-08	ukb-b-6066	ieu-b-89	Oral cavity and pharyngeal cancer || id:ieu-b-89	Tea intake || id:ukb-b-6066	32.7599	0.528322	32.6905	0.482443	-0.00490702	0.0186307	0.793892
5e-08	ukb-b-6066	ieu-b-94	Oral cavity cancer || id:ieu-b-94	Tea intake || id:ukb-b-6066	30.7678	0.626845	30.6897	0.582634	0.00638023	0.0228288	0.781619
5e-08	ukb-b-6066	ieu-b-96	Oropharyngeal cancer || id:ieu-b-96	Tea intake || id:ukb-b-6066	37.007	0.331852	36.4675	0.31058	-0.0181208	0.0259339	0.489615
5e-08	ukb-b-6066	ieu-b-90	Oral cavity and pharyngeal cancer || id:ieu-b-90	Tea intake || id:ukb-b-6066	28.0542	0.753566	28.0486	0.712154	0.00144922	0.0193888	0.940869
5e-08	ukb-b-6066	ieu-b-93	Oral cavity cancer || id:ieu-b-93	Tea intake || id:ukb-b-6066	35.9325	0.378038	35.6804	0.343461	-0.0118512	0.0245397	0.632327
5e-08	ukb-b-6066	ieu-b-97	Oropharyngeal cancer || id:ieu-b-97	Tea intake || id:ukb-b-6066	28.041	0.754143	27.7501	0.725996	0.0131332	0.0243537	0.593322
5e-08	ukb-b-6066	finn-b-C3_LIP_ORAL_PHARYNX	Malignant neoplasm of lip, oral cavity and pharynx || id:finn-b-C3_LIP_ORAL_PHARYNX	Tea intake || id:ukb-b-6066	32.838	0.706716	32.8378	0.664559	-0.000754017	0.0509284	0.988267
5e-08	ukb-b-6066	finn-b-C3_LIP_ORAL_PHARYNX_EXALLC	"Malignant neoplasm of lip, oral cavity and pharynx" (all cancers excluded) || id:finn-b-C3_LIP_ORAL_PHARYNX_EXALLC	Tea intake || id:ukb-b-6066	32.2364	0.732468	32.2363	0.691827	-0.000343788	0.0509891	0.994657
5e-08	ukb-b-6066	finn-b-C3_LARYNX	Malignant neoplasm of larynx || id:finn-b-C3_LARYNX	Tea intake || id:ukb-b-6066	41.7997	0.309216	40.717	0.310162	0.0448105	0.0451767	0.327692
5e-08	ukb-b-6066	finn-b-C3_LARYNX_EXALLC	Malignant neoplasm of larynx (all cancers excluded) || id:finn-b-C3_LARYNX_EXALLC	Tea intake || id:ukb-b-6066	42.8397	0.271267	41.6884	0.274129	0.0462721	0.0457749	0.318647
5e-08	ukb-b-4078	ieu-b-89	Oral cavity and pharyngeal cancer || id:ieu-b-89	Green tea intake || id:ukb-b-4078	7.31903	0.292348	6.68377	0.24524	0.0665751	0.0965744	0.521273
5e-08	ukb-b-4078	ieu-b-94	Oral cavity cancer || id:ieu-b-94	Green tea intake || id:ukb-b-4078	2.11672	0.908656	2.10728	0.834111	0.0100636	0.103529	0.926339
5e-08	ukb-b-4078	ieu-b-96	Oropharyngeal cancer || id:ieu-b-96	Green tea intake || id:ukb-b-4078	8.69991	0.191171	7.28566	0.200248	0.129857	0.13181	0.369778
5e-08	ukb-b-4078	ieu-b-90	Oral cavity and pharyngeal cancer || id:ieu-b-90	Green tea intake || id:ukb-b-4078	2.49554	0.868967	1.32918	0.9319	0.0956421	0.0885592	0.329469
5e-08	ukb-b-4078	ieu-b-93	Oral cavity cancer || id:ieu-b-93	Green tea intake || id:ukb-b-4078	3.39825	0.757454	2.16405	0.826011	0.122989	0.110707	0.317139
5e-08	ukb-b-4078	ieu-b-97	Oropharyngeal cancer || id:ieu-b-97	Green tea intake || id:ukb-b-4078	1.57078	0.954655	1.51242	0.911633	0.0267897	0.110889	0.818693
5e-08	ukb-b-4078	finn-b-C3_LIP_ORAL_PHARYNX	Malignant neoplasm of lip, oral cavity and pharynx || id:finn-b-C3_LIP_ORAL_PHARYNX	Green tea intake || id:ukb-b-4078	12.8684	0.845241	11.2461	0.883621	0.229817	0.180438	0.218985
5e-08	ukb-b-4078	finn-b-C3_LIP_ORAL_PHARYNX_EXALLC	"Malignant neoplasm of lip, oral cavity and pharynx" (all cancers excluded) || id:finn-b-C3_LIP_ORAL_PHARYNX_EXALLC	Green tea intake || id:ukb-b-4078	12.6093	0.857959	10.9731	0.895496	0.231117	0.180681	0.217092
5e-08	ukb-b-4078	finn-b-C3_LARYNX	Malignant neoplasm of larynx || id:finn-b-C3_LARYNX	Green tea intake || id:ukb-b-4078	16.9581	0.592706	15.9122	0.598674	-0.155961	0.152502	0.320005
5e-08	ukb-b-4078	finn-b-C3_LARYNX_EXALLC	Malignant neoplasm of larynx (all cancers excluded) || id:finn-b-C3_LARYNX_EXALLC	Green tea intake || id:ukb-b-4078	16.8979	0.596788	15.8961	0.599799	-0.152679	0.152544	0.330149
5e-08	ukb-b-13344	ieu-b-89	Oral cavity and pharyngeal cancer || id:ieu-b-89	Herbal tea intake || id:ukb-b-13344	2.30487	0.805551	2.26801	0.6866	-0.0806066	0.419833	0.857098
5e-08	ukb-b-13344	ieu-b-94	Oral cavity cancer || id:ieu-b-94	Herbal tea intake || id:ukb-b-13344	2.19044	0.822216	1.83539	0.766001	-0.306436	0.514281	0.583352
5e-08	ukb-b-13344	ieu-b-96	Oropharyngeal cancer || id:ieu-b-96	Herbal tea intake || id:ukb-b-13344	2.06112	0.840625	1.88538	0.75683	-0.232456	0.554505	0.696594
5e-08	ukb-b-13344	ieu-b-90	Oral cavity and pharyngeal cancer || id:ieu-b-90	Herbal tea intake || id:ukb-b-13344	2.86667	0.720532	2.85608	0.582192	0.0480969	0.467226	0.922964
5e-08	ukb-b-13344	ieu-b-93	Oral cavity cancer || id:ieu-b-93	Herbal tea intake || id:ukb-b-13344	4.82126	0.438081	4.20942	0.378406	0.435719	0.571434	0.488246
5e-08	ukb-b-13344	ieu-b-97	Oropharyngeal cancer || id:ieu-b-97	Herbal tea intake || id:ukb-b-13344	7.85393	0.164472	7.47572	0.112785	-0.378184	0.840692	0.676121
5e-08	ukb-b-13344	finn-b-C3_LIP_ORAL_PHARYNX	Malignant neoplasm of lip, oral cavity and pharynx || id:finn-b-C3_LIP_ORAL_PHARYNX	Herbal tea intake || id:ukb-b-13344	17.9834	0.456749	17.0731	0.449425	-0.546336	0.573863	0.354422
5e-08	ukb-b-13344	finn-b-C3_LIP_ORAL_PHARYNX_EXALLC	"Malignant neoplasm of lip, oral cavity and pharynx" (all cancers excluded) || id:finn-b-C3_LIP_ORAL_PHARYNX_EXALLC	Herbal tea intake || id:ukb-b-13344	18.0066	0.455216	17.0734	0.449402	-0.552975	0.57366	0.348587
5e-08	ukb-b-13344	finn-b-C3_LARYNX	Malignant neoplasm of larynx || id:finn-b-C3_LARYNX	Herbal tea intake || id:ukb-b-13344	21.2939	0.264845	21.2691	0.214484	-0.0760706	0.540348	0.889698
5e-08	ukb-b-13344	finn-b-C3_LARYNX_EXALLC	Malignant neoplasm of larynx (all cancers excluded) || id:finn-b-C3_LARYNX_EXALLC	Herbal tea intake || id:ukb-b-13344	20.7162	0.293971	20.679	0.240979	-0.0931615	0.532498	0.863184
5e-08	ukb-b-3291	ieu-b-89	Oral cavity and pharyngeal cancer || id:ieu-b-89	Standard tea intake || id:ukb-b-3291	NA	NA	NA	NA	NA	NA	NA
5e-08	ukb-b-3291	ieu-b-94	Oral cavity cancer || id:ieu-b-94	Standard tea intake || id:ukb-b-3291	NA	NA	NA	NA	NA	NA	NA
5e-08	ukb-b-3291	ieu-b-96	Oropharyngeal cancer || id:ieu-b-96	Standard tea intake || id:ukb-b-3291	NA	NA	NA	NA	NA	NA	NA
5e-08	ukb-b-3291	ieu-b-90	Oral cavity and pharyngeal cancer || id:ieu-b-90	Standard tea intake || id:ukb-b-3291	NA	NA	NA	NA	NA	NA	NA
5e-08	ukb-b-3291	ieu-b-93	Oral cavity cancer || id:ieu-b-93	Standard tea intake || id:ukb-b-3291	NA	NA	NA	NA	NA	NA	NA
5e-08	ukb-b-3291	ieu-b-97	Oropharyngeal cancer || id:ieu-b-97	Standard tea intake || id:ukb-b-3291	NA	NA	NA	NA	NA	NA	NA
5e-08	ukb-b-3291	finn-b-C3_LIP_ORAL_PHARYNX	Malignant neoplasm of lip, oral cavity and pharynx || id:finn-b-C3_LIP_ORAL_PHARYNX	Standard tea intake || id:ukb-b-3291	NA	NA	NA	NA	NA	NA	NA
5e-08	ukb-b-3291	finn-b-C3_LIP_ORAL_PHARYNX_EXALLC	"Malignant neoplasm of lip, oral cavity and pharynx" (all cancers excluded) || id:finn-b-C3_LIP_ORAL_PHARYNX_EXALLC	Standard tea intake || id:ukb-b-3291	NA	NA	NA	NA	NA	NA	NA
5e-08	ukb-b-3291	finn-b-C3_LARYNX	Malignant neoplasm of larynx || id:finn-b-C3_LARYNX	Standard tea intake || id:ukb-b-3291	NA	NA	NA	NA	NA	NA	NA
5e-08	ukb-b-3291	finn-b-C3_LARYNX_EXALLC	Malignant neoplasm of larynx (all cancers excluded) || id:finn-b-C3_LARYNX_EXALLC	Standard tea intake || id:ukb-b-3291	NA	NA	NA	NA	NA	NA	NA
5e-08	ukb-b-5209	ieu-b-89	Oral cavity and pharyngeal cancer || id:ieu-b-89	Added milk to standard tea || id:ukb-b-5209	NA	NA	NA	NA	NA	NA	NA
5e-08	ukb-b-5209	ieu-b-94	Oral cavity cancer || id:ieu-b-94	Added milk to standard tea || id:ukb-b-5209	NA	NA	NA	NA	NA	NA	NA
5e-08	ukb-b-5209	ieu-b-96	Oropharyngeal cancer || id:ieu-b-96	Added milk to standard tea || id:ukb-b-5209	NA	NA	NA	NA	NA	NA	NA
5e-08	ukb-b-5209	ieu-b-90	Oral cavity and pharyngeal cancer || id:ieu-b-90	Added milk to standard tea || id:ukb-b-5209	NA	NA	NA	NA	NA	NA	NA
5e-08	ukb-b-5209	ieu-b-93	Oral cavity cancer || id:ieu-b-93	Added milk to standard tea || id:ukb-b-5209	NA	NA	NA	NA	NA	NA	NA
5e-08	ukb-b-5209	ieu-b-97	Oropharyngeal cancer || id:ieu-b-97	Added milk to standard tea || id:ukb-b-5209	NA	NA	NA	NA	NA	NA	NA
5e-08	ukb-b-5209	finn-b-C3_LIP_ORAL_PHARYNX	Malignant neoplasm of lip, oral cavity and pharynx || id:finn-b-C3_LIP_ORAL_PHARYNX	Added milk to standard tea || id:ukb-b-5209	NA	NA	NA	NA	NA	NA	NA
5e-08	ukb-b-5209	finn-b-C3_LIP_ORAL_PHARYNX_EXALLC	"Malignant neoplasm of lip, oral cavity and pharynx" (all cancers excluded) || id:finn-b-C3_LIP_ORAL_PHARYNX_EXALLC	Added milk to standard tea || id:ukb-b-5209	NA	NA	NA	NA	NA	NA	NA
5e-08	ukb-b-5209	finn-b-C3_LARYNX	Malignant neoplasm of larynx || id:finn-b-C3_LARYNX	Added milk to standard tea || id:ukb-b-5209	NA	NA	NA	NA	NA	NA	NA
5e-08	ukb-b-5209	finn-b-C3_LARYNX_EXALLC	Malignant neoplasm of larynx (all cancers excluded) || id:finn-b-C3_LARYNX_EXALLC	Added milk to standard tea || id:ukb-b-5209	NA	NA	NA	NA	NA	NA	NA
5e-07	ukb-b-8553	ieu-b-89	Oral cavity and pharyngeal cancer || id:ieu-b-89	|| id:ukb-b-8553	NA	NA	NA	NA	NA	NA	NA
5e-07	ukb-b-8553	ieu-b-94	Oral cavity cancer || id:ieu-b-94	|| id:ukb-b-8553	NA	NA	NA	NA	NA	NA	NA
5e-07	ukb-b-8553	ieu-b-96	Oropharyngeal cancer || id:ieu-b-96	|| id:ukb-b-8553	NA	NA	NA	NA	NA	NA	NA
5e-07	ukb-b-8553	ieu-b-90	Oral cavity and pharyngeal cancer || id:ieu-b-90	|| id:ukb-b-8553	NA	NA	NA	NA	NA	NA	NA
5e-07	ukb-b-8553	ieu-b-93	Oral cavity cancer || id:ieu-b-93	|| id:ukb-b-8553	NA	NA	NA	NA	NA	NA	NA
5e-07	ukb-b-8553	ieu-b-97	Oropharyngeal cancer || id:ieu-b-97	|| id:ukb-b-8553	NA	NA	NA	NA	NA	NA	NA
5e-07	ukb-b-8553	finn-b-C3_LIP_ORAL_PHARYNX	Malignant neoplasm of lip, oral cavity and pharynx || id:finn-b-C3_LIP_ORAL_PHARYNX	|| id:ukb-b-8553	NA	NA	NA	NA	NA	NA	NA
5e-07	ukb-b-8553	finn-b-C3_LIP_ORAL_PHARYNX_EXALLC	"Malignant neoplasm of lip, oral cavity and pharynx" (all cancers excluded) || id:finn-b-C3_LIP_ORAL_PHARYNX_EXALLC	|| id:ukb-b-8553	NA	NA	NA	NA	NA	NA	NA
5e-07	ukb-b-8553	finn-b-C3_LARYNX	Malignant neoplasm of larynx || id:finn-b-C3_LARYNX	|| id:ukb-b-8553	NA	NA	NA	NA	NA	NA	NA
5e-07	ukb-b-8553	finn-b-C3_LARYNX_EXALLC	Malignant neoplasm of larynx (all cancers excluded) || id:finn-b-C3_LARYNX_EXALLC	|| id:ukb-b-8553	NA	NA	NA	NA	NA	NA	NA
5e-08	ukb-b-11491	ieu-b-89	Oral cavity and pharyngeal cancer || id:ieu-b-89	Added milk to rooibos tea || id:ukb-b-11491	NA	NA	NA	NA	NA	NA	NA
5e-08	ukb-b-11491	ieu-b-94	Oral cavity cancer || id:ieu-b-94	Added milk to rooibos tea || id:ukb-b-11491	NA	NA	NA	NA	NA	NA	NA
5e-08	ukb-b-11491	ieu-b-96	Oropharyngeal cancer || id:ieu-b-96	Added milk to rooibos tea || id:ukb-b-11491	NA	NA	NA	NA	NA	NA	NA
5e-08	ukb-b-11491	ieu-b-90	Oral cavity and pharyngeal cancer || id:ieu-b-90	Added milk to rooibos tea || id:ukb-b-11491	NA	NA	NA	NA	NA	NA	NA
5e-08	ukb-b-11491	ieu-b-93	Oral cavity cancer || id:ieu-b-93	Added milk to rooibos tea || id:ukb-b-11491	NA	NA	NA	NA	NA	NA	NA
5e-08	ukb-b-11491	ieu-b-97	Oropharyngeal cancer || id:ieu-b-97	Added milk to rooibos tea || id:ukb-b-11491	NA	NA	NA	NA	NA	NA	NA
5e-08	ukb-b-11491	finn-b-C3_LIP_ORAL_PHARYNX	Malignant neoplasm of lip, oral cavity and pharynx || id:finn-b-C3_LIP_ORAL_PHARYNX	Added milk to rooibos tea || id:ukb-b-11491	NA	NA	NA	NA	NA	NA	NA
5e-08	ukb-b-11491	finn-b-C3_LIP_ORAL_PHARYNX_EXALLC	"Malignant neoplasm of lip, oral cavity and pharynx" (all cancers excluded) || id:finn-b-C3_LIP_ORAL_PHARYNX_EXALLC	Added milk to rooibos tea || id:ukb-b-11491	NA	NA	NA	NA	NA	NA	NA
5e-08	ukb-b-11491	finn-b-C3_LARYNX	Malignant neoplasm of larynx || id:finn-b-C3_LARYNX	Added milk to rooibos tea || id:ukb-b-11491	NA	NA	NA	NA	NA	NA	NA
5e-08	ukb-b-11491	finn-b-C3_LARYNX_EXALLC	Malignant neoplasm of larynx (all cancers excluded) || id:finn-b-C3_LARYNX_EXALLC	Added milk to rooibos tea || id:ukb-b-11491	NA	NA	NA	NA	NA	NA	NA
5e-08	ukb-b-17988	ieu-b-89	Oral cavity and pharyngeal cancer || id:ieu-b-89	Tea consumed || id:ukb-b-17988	NA	NA	NA	NA	NA	NA	NA
5e-08	ukb-b-17988	ieu-b-94	Oral cavity cancer || id:ieu-b-94	Tea consumed || id:ukb-b-17988	NA	NA	NA	NA	NA	NA	NA
5e-08	ukb-b-17988	ieu-b-96	Oropharyngeal cancer || id:ieu-b-96	Tea consumed || id:ukb-b-17988	NA	NA	NA	NA	NA	NA	NA
5e-08	ukb-b-17988	ieu-b-90	Oral cavity and pharyngeal cancer || id:ieu-b-90	Tea consumed || id:ukb-b-17988	NA	NA	NA	NA	NA	NA	NA
5e-08	ukb-b-17988	ieu-b-93	Oral cavity cancer || id:ieu-b-93	Tea consumed || id:ukb-b-17988	NA	NA	NA	NA	NA	NA	NA
5e-08	ukb-b-17988	ieu-b-97	Oropharyngeal cancer || id:ieu-b-97	Tea consumed || id:ukb-b-17988	NA	NA	NA	NA	NA	NA	NA
5e-08	ukb-b-17988	finn-b-C3_LIP_ORAL_PHARYNX	Malignant neoplasm of lip, oral cavity and pharynx || id:finn-b-C3_LIP_ORAL_PHARYNX	Tea consumed || id:ukb-b-17988	NA	NA	NA	NA	NA	NA	NA
5e-08	ukb-b-17988	finn-b-C3_LIP_ORAL_PHARYNX_EXALLC	"Malignant neoplasm of lip, oral cavity and pharynx" (all cancers excluded) || id:finn-b-C3_LIP_ORAL_PHARYNX_EXALLC	Tea consumed || id:ukb-b-17988	NA	NA	NA	NA	NA	NA	NA
5e-08	ukb-b-17988	finn-b-C3_LARYNX	Malignant neoplasm of larynx || id:finn-b-C3_LARYNX	Tea consumed || id:ukb-b-17988	NA	NA	NA	NA	NA	NA	NA
5e-08	ukb-b-17988	finn-b-C3_LARYNX_EXALLC	Malignant neoplasm of larynx (all cancers excluded) || id:finn-b-C3_LARYNX_EXALLC	Tea consumed || id:ukb-b-17988	NA	NA	NA	NA	NA	NA	NA
5e-06	ukb-b-3291	ieu-b-89	Oral cavity and pharyngeal cancer || id:ieu-b-89	|| id:ukb-b-3291	8.34757	0.820243	6.69295	0.87722	0.0554483	0.0431061	0.222595
5e-06	ukb-b-3291	ieu-b-94	Oral cavity cancer || id:ieu-b-94	|| id:ukb-b-3291	9.10719	0.7648	9.0708	0.696872	0.0100781	0.0528261	0.851889
5e-06	ukb-b-3291	ieu-b-96	Oropharyngeal cancer || id:ieu-b-96	|| id:ukb-b-3291	16.3189	0.232338	14.0519	0.297407	0.0856443	0.0615533	0.189365
5e-06	ukb-b-3291	ieu-b-90	Oral cavity and pharyngeal cancer || id:ieu-b-90	|| id:ukb-b-3291	15.403	0.282875	13.813	0.312806	-0.0557116	0.0474034	0.262681
5e-06	ukb-b-3291	ieu-b-93	Oral cavity cancer || id:ieu-b-93	|| id:ukb-b-3291	13.7129	0.394366	11.8219	0.460085	-0.0742199	0.0539726	0.194218
5e-06	ukb-b-3291	ieu-b-97	Oropharyngeal cancer || id:ieu-b-97	|| id:ukb-b-3291	11.3952	0.577747	11.0043	0.528554	-0.0347494	0.0555767	0.543514
5e-06	ukb-b-3291	finn-b-C3_LIP_ORAL_PHARYNX	Malignant neoplasm of lip, oral cavity and pharynx || id:finn-b-C3_LIP_ORAL_PHARYNX	|| id:ukb-b-3291	17.3719	0.182855	15.6794	0.206367	-0.157909	0.138742	0.277273
5e-06	ukb-b-3291	finn-b-C3_LIP_ORAL_PHARYNX_EXALLC	"Malignant neoplasm of lip, oral cavity and pharynx" (all cancers excluded) || id:finn-b-C3_LIP_ORAL_PHARYNX_EXALLC	|| id:ukb-b-3291	17.1661	0.191821	15.4883	0.215813	-0.157459	0.138103	0.276468
5e-06	ukb-b-3291	finn-b-C3_LARYNX	Malignant neoplasm of larynx || id:finn-b-C3_LARYNX	|| id:ukb-b-3291	9.7764	0.712109	9.53543	0.656644	0.050373	0.102618	0.632365
5e-06	ukb-b-3291	finn-b-C3_LARYNX_EXALLC	Malignant neoplasm of larynx (all cancers excluded) || id:finn-b-C3_LARYNX_EXALLC	|| id:ukb-b-3291	10.6136	0.643151	10.3727	0.583301	0.0504667	0.102815	0.632387
5e-06	ukb-b-5209	ieu-b-89	Oral cavity and pharyngeal cancer || id:ieu-b-89	|| id:ukb-b-5209	8.99282	0.913709	8.27689	0.912203	0.0397127	0.0469349	0.410779
5e-06	ukb-b-5209	ieu-b-94	Oral cavity cancer || id:ieu-b-94	|| id:ukb-b-5209	13.1773	0.659756	12.8641	0.612791	0.0320425	0.0572629	0.584034
5e-06	ukb-b-5209	ieu-b-96	Oropharyngeal cancer || id:ieu-b-96	|| id:ukb-b-5209	15.1819	0.511357	15.0579	0.447252	0.0220439	0.0627262	0.730153
5e-06	ukb-b-5209	ieu-b-90	Oral cavity and pharyngeal cancer || id:ieu-b-90	|| id:ukb-b-5209	13.8952	0.606521	13.7866	0.541773	-0.0154137	0.046767	0.746271
5e-06	ukb-b-5209	ieu-b-93	Oral cavity cancer || id:ieu-b-93	|| id:ukb-b-5209	11.8765	0.752434	9.48997	0.850538	-0.0852741	0.0551989	0.143215
5e-06	ukb-b-5209	ieu-b-97	Oropharyngeal cancer || id:ieu-b-97	|| id:ukb-b-5209	20.6496	0.192377	19.4303	0.194893	0.0681203	0.0702129	0.347334
5e-06	ukb-b-5209	finn-b-C3_LIP_ORAL_PHARYNX	Malignant neoplasm of lip, oral cavity and pharynx || id:finn-b-C3_LIP_ORAL_PHARYNX	|| id:ukb-b-5209	13.929	0.787815	13.7756	0.743598	-0.0375743	0.0959379	0.699913
5e-06	ukb-b-5209	finn-b-C3_LIP_ORAL_PHARYNX_EXALLC	"Malignant neoplasm of lip, oral cavity and pharynx" (all cancers excluded) || id:finn-b-C3_LIP_ORAL_PHARYNX_EXALLC	|| id:ukb-b-5209	13.9669	0.78562	13.8205	0.740718	-0.0367146	0.0959594	0.706493
5e-06	ukb-b-5209	finn-b-C3_LARYNX	Malignant neoplasm of larynx || id:finn-b-C3_LARYNX	|| id:ukb-b-5209	12.4414	0.865904	10.6969	0.906775	0.106658	0.0807529	0.203117
5e-06	ukb-b-5209	finn-b-C3_LARYNX_EXALLC	Malignant neoplasm of larynx (all cancers excluded) || id:finn-b-C3_LARYNX_EXALLC	|| id:ukb-b-5209	12.4638	0.864853	10.7077	0.906346	0.107163	0.0808662	0.201684
5e-06	ukb-b-8553	ieu-b-89	Oral cavity and pharyngeal cancer || id:ieu-b-89	|| id:ukb-b-8553	25.3137	0.0458864	23.7686	0.0488569	-0.063357	0.0664145	0.356285
5e-06	ukb-b-8553	ieu-b-94	Oral cavity cancer || id:ieu-b-94	|| id:ukb-b-8553	14.314	0.501863	14.2285	0.432828	-0.0183566	0.063313	0.776117
5e-06	ukb-b-8553	ieu-b-96	Oropharyngeal cancer || id:ieu-b-96	|| id:ukb-b-8553	26.8789	0.0297387	23.6727	0.0501671	-0.119584	0.0868437	0.19013
5e-06	ukb-b-8553	ieu-b-90	Oral cavity and pharyngeal cancer || id:ieu-b-90	|| id:ukb-b-8553	14.1082	0.517337	14.0582	0.445388	-0.0115334	0.0516439	0.826508
5e-06	ukb-b-8553	ieu-b-93	Oral cavity cancer || id:ieu-b-93	|| id:ukb-b-8553	6.50443	0.969973	6.48364	0.952792	-0.00906387	0.0628588	0.887402
5e-06	ukb-b-8553	ieu-b-97	Oropharyngeal cancer || id:ieu-b-97	|| id:ukb-b-8553	14.4678	0.490384	14.4521	0.416598	-0.00810099	0.0657023	0.903623
5e-06	ukb-b-8553	finn-b-C3_LIP_ORAL_PHARYNX	Malignant neoplasm of lip, oral cavity and pharynx || id:finn-b-C3_LIP_ORAL_PHARYNX	|| id:ukb-b-8553	20.512	0.19804	19.166	0.20631	0.138024	0.134478	0.320985
5e-06	ukb-b-8553	finn-b-C3_LIP_ORAL_PHARYNX_EXALLC	"Malignant neoplasm of lip, oral cavity and pharynx" (all cancers excluded) || id:finn-b-C3_LIP_ORAL_PHARYNX_EXALLC	|| id:ukb-b-8553	20.8777	0.183258	19.5267	0.190851	0.138383	0.135836	0.32447
5e-06	ukb-b-8553	finn-b-C3_LARYNX	Malignant neoplasm of larynx || id:finn-b-C3_LARYNX	|| id:ukb-b-8553	17.7954	0.336014	17.7953	0.273579	0.000854993	0.109547	0.993876
5e-06	ukb-b-8553	finn-b-C3_LARYNX_EXALLC	Malignant neoplasm of larynx (all cancers excluded) || id:finn-b-C3_LARYNX_EXALLC	|| id:ukb-b-8553	17.6527	0.344625	17.6526	0.281367	-0.000375603	0.109205	0.997301
5e-06	ukb-b-11491	ieu-b-89	Oral cavity and pharyngeal cancer || id:ieu-b-89	|| id:ukb-b-11491	13.5401	0.259494	10.1843	0.424472	-0.087055	0.0479585	0.0995515
5e-06	ukb-b-11491	ieu-b-94	Oral cavity cancer || id:ieu-b-94	|| id:ukb-b-11491	17.3455	0.0980641	15.4763	0.115639	-0.079733	0.072551	0.297525
5e-06	ukb-b-11491	ieu-b-96	Oropharyngeal cancer || id:ieu-b-96	|| id:ukb-b-11491	14.1682	0.223825	8.1072	0.618366	-0.155794	0.0632817	0.0335665
5e-06	ukb-b-11491	ieu-b-90	Oral cavity and pharyngeal cancer || id:ieu-b-90	|| id:ukb-b-11491	16.9648	0.108923	14.6108	0.146908	-0.0753287	0.0593474	0.233084
5e-06	ukb-b-11491	ieu-b-93	Oral cavity cancer || id:ieu-b-93	|| id:ukb-b-11491	12.7454	0.310293	12.3559	0.261945	-0.0377171	0.0671767	0.586845
5e-06	ukb-b-11491	ieu-b-97	Oropharyngeal cancer || id:ieu-b-97	|| id:ukb-b-11491	14.4298	0.210115	11.5796	0.314175	-0.103965	0.0662671	0.147747
5e-06	ukb-b-11491	finn-b-C3_LIP_ORAL_PHARYNX	Malignant neoplasm of lip, oral cavity and pharynx || id:finn-b-C3_LIP_ORAL_PHARYNX	|| id:ukb-b-11491	9.62501	0.885464	5.84011	0.98231	0.222028	0.114125	0.0707045
5e-06	ukb-b-11491	finn-b-C3_LIP_ORAL_PHARYNX_EXALLC	"Malignant neoplasm of lip, oral cavity and pharynx" (all cancers excluded) || id:finn-b-C3_LIP_ORAL_PHARYNX_EXALLC	|| id:ukb-b-11491	9.75416	0.879147	5.87471	0.981776	0.224802	0.114134	0.0676344
5e-06	ukb-b-11491	finn-b-C3_LARYNX	Malignant neoplasm of larynx || id:finn-b-C3_LARYNX	|| id:ukb-b-11491	15.9061	0.459531	15.5285	0.414058	0.0594164	0.098379	0.554899
5e-06	ukb-b-11491	finn-b-C3_LARYNX_EXALLC	Malignant neoplasm of larynx (all cancers excluded) || id:finn-b-C3_LARYNX_EXALLC	|| id:ukb-b-11491	16.025	0.451217	15.5695	0.411225	0.0652227	0.0984572	0.517734
5e-06	ukb-b-17988	ieu-b-89	Oral cavity and pharyngeal cancer || id:ieu-b-89	|| id:ukb-b-17988	5.05417	0.88753	4.08524	0.905713	0.0524348	0.0532689	0.350669
5e-06	ukb-b-17988	ieu-b-94	Oral cavity cancer || id:ieu-b-94	|| id:ukb-b-17988	8.28582	0.600941	7.04352	0.632588	0.0716075	0.064246	0.293907
5e-06	ukb-b-17988	ieu-b-96	Oropharyngeal cancer || id:ieu-b-96	|| id:ukb-b-17988	6.1897	0.799082	5.59274	0.779884	0.0558394	0.072272	0.459551
5e-06	ukb-b-17988	ieu-b-90	Oral cavity and pharyngeal cancer || id:ieu-b-90	|| id:ukb-b-17988	10.4814	0.487673	10.3133	0.413449	-0.01966	0.0486964	0.694912
5e-06	ukb-b-17988	ieu-b-93	Oral cavity cancer || id:ieu-b-93	|| id:ukb-b-17988	9.03341	0.618808	9.03231	0.52904	-0.00196141	0.0591483	0.974199
5e-06	ukb-b-17988	ieu-b-97	Oropharyngeal cancer || id:ieu-b-97	|| id:ukb-b-17988	9.55944	0.570396	9.27627	0.506101	-0.0320128	0.0601586	0.606248
5e-06	ukb-b-17988	finn-b-C3_LIP_ORAL_PHARYNX	Malignant neoplasm of lip, oral cavity and pharynx || id:finn-b-C3_LIP_ORAL_PHARYNX	|| id:ukb-b-17988	8.26671	0.912645	8.26438	0.875102	-0.00423166	0.0876585	0.962179
5e-06	ukb-b-17988	finn-b-C3_LIP_ORAL_PHARYNX_EXALLC	"Malignant neoplasm of lip, oral cavity and pharynx" (all cancers excluded) || id:finn-b-C3_LIP_ORAL_PHARYNX_EXALLC	|| id:ukb-b-17988	8.36601	0.908272	8.35769	0.869871	-0.00802311	0.0879775	0.92863
5e-06	ukb-b-17988	finn-b-C3_LARYNX	Malignant neoplasm of larynx || id:finn-b-C3_LARYNX	|| id:ukb-b-17988	13.4619	0.566671	13.4517	0.491306	0.00746697	0.0740468	0.921106
5e-06	ukb-b-17988	finn-b-C3_LARYNX_EXALLC	Malignant neoplasm of larynx (all cancers excluded) || id:finn-b-C3_LARYNX_EXALLC	|| id:ukb-b-17988	13.7061	0.547929	13.7035	0.472024	0.00374136	0.0743481	0.960577
Table S4. Sensitivity analyses. We assessed the robustness of the results using sensitivity analysis and tested heterogeneity using Cochran's Q-test in the IVW test and MR-Egger regression. MR-Egger regression was used to estimate the effect of pleiotropy; it produced a more robust pleiotropy-corrected causal estimate under the assumptions of no measurement error and instrument strength independe…
